# Supplementary material
Source: PubMed Central journal article supplement (PMC5831107)
Supplement: NIHMS944080-supplement-supp_file_1.pdf [file NIHMS944080-supplement-supp_file_1.pdf]

## Supporting Information

### Domain-targeted metabolomics delineates the heterocycle assembly steps of colibactin biosynthesis

Eric P. Trautman<sup>1,2</sup>, Alan R. Healy<sup>1,2</sup>, Emilee E. Shine<sup>2,3</sup>, Seth B. Herzon<sup>1,4</sup>, Jason M. Crawford<sup>1,2,3,\*</sup>

<sup>1</sup>Department of Chemistry, Yale University, New Haven, Connecticut 06520, United States

<sup>2</sup>Chemical Biology Institute, Yale University, West Haven, Connecticut 06516, United States

<sup>3</sup>Department of Microbial Pathogenesis, Yale School of Medicine, New Haven, Connecticut 06536, United States

<sup>4</sup>Department of Pharmacology, Yale School of Medicine, New Haven, Connecticut 06520, United States

#### Table of Contents

|                                 |         |
|---------------------------------|---------|
| 1. Experimental Methods.....    | S1-S6   |
| 2. Supplemental Tables.....     | S7-S36  |
| 3. Supplemental Figures.....    | S37-S45 |
| 4. Supplemental References..... | S46     |

## Experimental Methods

### Mutational inactivation of individual NRPS-PKS domains

Protein sequence alignments were generated to identify the active site residues of each NRPS-PKS domain, and these are shown in Figure S1. The mutations in each type of domain were made as follows. The conserved active site cysteine residues of ketosynthase (KS) domains were mutated to alanine. In the case of ClbI, the KS active site has a serine in place of a cysteine. This active site residue was mutated to the canonical cysteine residue and the inactivating alanine mutation. Acyl transferases (ATs) contain a consensus GxSxG active site motif. Serine to alanine mutations were generated to inactivate the AT domains. Carrier proteins in both NRPS and PKS contain a conserved serine residue, which is phosphopantetheinylated to generate their active holo-forms. These serine residues were mutated to alanine to prohibit posttranslational modification, and thus, abolish carrier protein activities. Condensation domains contain a conserved HHxxxDG active site motif, in which the second histidine acts as a general base.<sup>1</sup> These histidine residues were mutated to alanine to abolish activity.

The superfamily of adenylate-forming enzymes has a conserved TSGTTGKPKG motif.<sup>1</sup> This motif forms a flexible loop that interacts with the pyrophosphate leaving group. Mutation of the first glycine in this loop to a negatively charged aspartate has previously been shown to prevent adenylation activity.<sup>1</sup> This glycine was mutated in the A domains to aspartate.

Until recently, it was thought that a conserved DxxxxD motif in cyclization (Cy) domains was responsible for catalysis and that mutation of either aspartate to alanine would abolish activity. In our experiments, mutation of one aspartate reduced activity but did not abolish it, while mutation of both residues was sufficient to eliminate activity. A recent paper in which a cyclization domain was crystallized, showed that this motif is actually not in the active site.<sup>2</sup> Despite this, double mutation in the DxxxxD motif abolished Cy activity and was used in this study.

To the best of our knowledge, there has been no defining biochemical site-directed mutational inactivation studies of oxidase (Ox) domains in NRPS systems. However, the Ox domain falls into a superfamily of Nitro-FMN reductases, which require FMN as a cofactor. To abolish the activity of the Ox domain, a strategy where the FMN binding site was disrupted was employed. SWISS-MODEL was used to identify templates that shared structural similarity with the Ox domain. The FMN ligand was not modeled into the resulting structure, so the crystal structure of the closest homolog was used to identify residues important for FMN binding (Figure S2). Arginine and serine residues that are conserved across the family of FMN-dependent oxidoreductases were identified to form strong interactions with the phosphate of FMN. These two residues were individually mutated to glutamate to form an electrostatic repulsion with the phosphate and disrupt FMN binding. We analyzed both mutants. The arginine to glutamate mutation was more effective at abolishing activity than the serine to glutamate mutation.

### MAGE

Multiplex automated genome engineering (MAGE) was used to introduce point mutations on the bacterial artificial chromosome pBAC PKS<sup>3</sup> to individually inactivate select domains from the colibactin biosynthetic gene cluster. To do so, between three and five rounds of MAGE were performed on a high efficiency variant of EcNR1 containing pBAC PKS+. One round of MAGE was done as follows. First, 3 mL of Lysogeny Broth (LB) with 12.5 µg/mL chloramphenicol (CAM) was inoculated with overnight seed culture at a 1:200 ratio. The culture was grown at 37 °C until the OD<sub>600</sub> reached 0.4. Cultures were induced by incubating at 42 °C for 15 min. The cultures were split into 1 mL portions and cooled on ice. Cells were pelleted by spinning for 30 seconds at 21,000 × g at 4 °C. The supernatant was removed and cells were resuspended in 1 mL of chilled ddH<sub>2</sub>O. This process was repeated for a total of two washes before resuspending cells in 50 µL of chilled ddH<sub>2</sub>O. 1 µL of 50 µM oligonucleotide was added and cells were transferred to an electroporation cuvette with a 0.1 cm gap width. Cells were electroporated at 1800 V with 25 µF capacitance and 200Ω resistance. Transformed cells were recovered in 3 mL of LB + CAM at 30 or 34 °C until the OD<sub>600</sub> reached 0.4. At this point, cells were either induced for another MAGE cycle, let grow overnight to begin another cycle the next day, or plated on LB plates for screening.

### Primer design

MAGE oligonucleotides were designed as previously outlined<sup>4</sup> to introduce a single codon mutation. Oligonucleotides were designed to be 90 nucleotides long and contain two 5'-phosphorothioate modifications. The mutation was placed at least 10 nucleotides in from either end of the oligo. The oligo was designed to have a folding energy of greater than -12 kcal/mol as calculated by Mfold to minimize secondary structure.<sup>5</sup> For oligos with lower folding energies, more rounds of MAGE were performed to increase the proportion of mutant clones in the pool.

### Screening for mutants

Multiplex allele-specific colony PCR (MASC-PCR) was used to screen for mutations introduced by MAGE. Two primers were designed for each desired mutation, with the 3'-end of the primer matching either the wild-type or mutant sequence. The primer length was varied to keep the  $T_M$  of the two primers between 57-60 °C and within 1.5 °C of each other. Individual colonies were screened by PCR for introduction of the desired mutation, as described previously.<sup>4</sup> Mutants were validated by amplifying the gene of interest with overspanning PCR and sequencing.

### Construction of Deletion mutant $\Delta clbPO$

The  $\Delta clbO$  mutant was generated using the lambda Red recombinase system.<sup>6</sup> The FRT-flanked apramycin resistance cassette of plasmid pIJ773 was PCR amplified using primers with short sequence extensions homologous to the 5' and 3' ends of *clbO*. The PCR product was *DpnI*-digested, purified, and suspended in H<sub>2</sub>O. *E. coli* DH10B carrying recombineering plasmid pKD46 and pBAC-PKS were grown in LB with 100 µg/mL and 10 µM L-arabinose to an OD<sub>600</sub> of 0.6. The cells were pelleted by centrifugation and washed three times in ice-cold ddH<sub>2</sub>O. The cells were resuspended in 100 µL ice-cold ddH<sub>2</sub>O. Between 10 and 100 ng of PCR amplified apramycin resistance cassette was added to 25 µL of cells and transformed by electroporation (1800 V with 25 µF capacitance and 200Ω resistance). After 1.5 hours of phenotypic expression in 1 mL of LB at 30 °C, bacteria were plated on LB agar supplemented with 50 µg/mL apramycin and 12.5 µg/mL chloramphenicol and incubated at 30 °C for about 24 hours. Colonies were analyzed with overspanning PCR to confirm replacement of the gene of interest with the FRT-flanked antibiotic resistance cassette. Recombineering plasmid pKD46 was cured by growing respective colonies at 43 °C overnight, and the cassette was subsequently flipped out by transforming with plasmid pCP20 encoding the FLP recombinase. Successful deletion of the cassette in apramycin- and chloramphenicol-resistant colonies was confirmed by overspanning PCR. A point mutant in the peptidase *clbP* was subsequently generated on this strain through MAGE as previously described to obtain double mutant  $\Delta clbPO$ .

### Metabolomics

*E. coli* DH10B carrying pBAC, pBAC-PKS, or pBAC-PKS\* containing the point mutant(s) were grown overnight in LB+CAM. This overnight culture was used to inoculate 5 replicates of 5 mL of production media at a 1:200 dilution (Difco M9 + 2 mM MgSO<sub>4</sub> + 0.1 mM CaCl<sub>2</sub> + 5 g/L casamino acids + 0.4% glucose + 12.5 µg/mL CAM + 1 g/L of each of the following amino acids: L-serine, L-cysteine, L-alanine, L-valine, and L-asparagine). Cultures were grown at 37 °C with 250 rpm shaking to an OD<sub>600</sub> of 0.4-0.6. Cultures were cooled on ice for approximately 10 minutes before inducing with isopropyl- $\beta$ -D-galactopyranoside (IPTG) at a final concentration of 0.2 mM. Cultures were incubated at 25 °C for 42 hours before extraction. To extract, 5 mL of ethyl acetate (EtOAc) was added to the culture. Cultures were vortexed for 15-30 seconds each. The layers then were separated by centrifugation (3000 rpm × 10 min). The top 4 mL of the EtOAc layer was removed and transferred to a glass vial. The EtOAc was removed *in vacuo*. Dried extracts were dissolved in 0.5 mL of MeOH for metabolomic analysis. Due to the instability of several metabolites, extracts were immediately analyzed, and experiments were

performed in 4 sets: ClbH and ClbI mutants with a wild-type ClbP background; ClbH, ClbI, ClbL, and ClbQ mutants in a ClbP point mutant background; ClbJ mutants in a ClbP point mutant background; ClbK mutants in a ClbP point mutant background; and  $\Delta ClbPO$  mutants. Each set of experiments was normalized to the average abundance of ClbP or wild-type controls.

### Data acquisition

High-resolution mass spectrometry (HRMS) data was collected using an Agilent iFunnel 6550 Quadrupole-Time-of-Flight Mass Spectrometer (QTOF-MS) with an electrospray ionization (ESI) source. The mass spectrometer was coupled to an Agilent Infinity 1290 ultra-performance liquid chromatogram (UPLC). Separation of metabolites prior to MS acquisition was done using a Phenomenex Kinetex 1.7  $\mu$ M C18 100 Å column (100  $\times$  2.1 mm) with a water/acetonitrile (MeCN) gradient with 0.1% formic acid as an additive. The gradient used was as follows: 0-2 min 5% MeCN; 2-26 min 5-98% MeCN; hold at 98% for 7 min. The column temperature was kept at 25 °C with a flowrate of 0.3 mL/min. Mass spectra were gathered using Dual Agilent Jet Stream (AJS) ESI in positive mode. The mass range was set from 100 m/z to 1500 m/z with a scan speed of 1 scan/second. The capillary and nozzle voltages were set to 4000 V and 2000 V, respectively. The source parameters were set with a gas temperature of 225 °C and a flow rate of 15 L/min, nebulizer at 20 psig, and sheath gas temperature at 275 °C at a flow of 12 L/min. MS data were acquired with MassHunter Workstation Data Acquisition (Version B.06.01, Agilent Technologies). Data was analyzed using MassHunter Qualitative Analysis (Version B.06.00, Agilent Technologies). To quantify production levels of ions of interest, the exact mass was extracted with a 10 ppm window of error. EICs were integrated for each of the five replicates and normalized to the average abundance of the metabolite in the ClbP samples.

### Cyclization of linear Precolibactin C

Linear precolibactin **7** was obtained via synthesis as previously reported.<sup>7</sup> To perform the cyclization reaction, 0.3 mg of **7** was dissolved in 50  $\mu$ L DMSO containing potassium carbonate (3 mg/mL solution, 3.0 equivalents). The reaction was incubated at room temperature for 4 hours then diluted 1:1000 with MeOH for LC-MS analysis.

### Isotopic labeling of precolibactin thiazoline **4**

*E. coli* DH10B carrying pBAC, pBAC-PKS, or pBAC-PKS\* with individual point mutants were grown overnight in LB+CAM. This overnight culture was used to inoculate 3 replicates of 5 mL of production media at a 1:200 dilution (Difco M9 + 2 mM MgSO<sub>4</sub> + 0.1 mM CaCl<sub>2</sub> + 5 g/L casamino acids + 0.4% glucose + 12.5  $\mu$ g/mL CAM + 4% (w/v) L-[U-<sup>13</sup>C]-cysteine + 1 g/L of each of the following amino acids: L-serine, L-alanine, L-valine, and L-asparagine). Cultures were grown at 37 °C with 250 rpm shaking to an OD<sub>600</sub> of 0.4-0.6. Cultures were cooled on ice for approximately 10 minutes before inducing with isopropyl- $\beta$ -D-galactopyranoside (IPTG) at a final concentration of 0.2 mM. Cultures were incubated at 25 °C for 42 hours before extraction. Extraction and metabolomic analysis was performed as described above.

### Cleavage of **2** to confirm the structures of S23 and S24

25  $\mu$ L of an overnight 5 mL culture of pBAD18 or pPEB018 (pClbP) in LB + 100  $\mu$ g/mL Amp was used to inoculate 5 mL of fresh LB + 100  $\mu$ g/mL Amp. Cultures were incubated at 37 °C with 250 rpm shaking until the OD<sub>600</sub> of the culture was between 0.4 and 0.5. At this point, L-arabinose (final concentration 0.01%) was added to induce protein expression. Cultures were incubated at 37 °C for 30 min. The synthetic substrate, **2**, was dissolved in DMSO to a concentration of 10 mM. 5  $\mu$ L of substrate solution was added (final concentration of 10  $\mu$ M) and incubated at 37 °C. After four hours, 2.5 mL aliquots were removed and extracted with 5 mL EtOAc. Samples were vortexed for 20 seconds, centrifuged (3000 rpm, 10 min) to separate the layers, and 4 mL EtOAc were removed and dried *in vacuo*. The remaining 2.5 mL of unextracted culture was incubated for an additional four hours before extracting

as above. The dried samples were dissolved in 0.5 mL MeOH for LC-MS analysis. Cleavage of **2** is shown in Figure S3.

#### **Cleavage of 7 by ClbP**

Starter cultures of pBAD18 or pPEB018 were inoculated into 5 mL of LB + 100 µg/mL Amp. 25 µL of an overnight 5 mL culture of pBAD18 or pPEB018 (pClbP) in LB + 100 µg/mL Amp was used to inoculate 5 mL of fresh LB + 100 µg/mL Amp. Cultures were incubated at 37 °C with 250 rpm shaking until the OD<sub>600</sub> of the culture was between 0.4 and 0.5. L-arabinose (final concentration 0.01%) was added to induce protein expression. Cultures were incubated at 37 °C for 30 min. The synthetic substrate **7** was dissolved in DMSO to a concentration of 5 mM. 50 µL of substrate solution was added (final concentration 50 µM) and incubated at 37 °C for 24 hours. After 24 hours, the cultures were extracted with 5 mL butanol (BuOH). Samples were vortexed for 20 seconds, centrifuged (3000 rpm, 10 min) to separate the layers, and 4 mL BuOH were removed and dried *in vacuo*. The dried samples were dissolved in 0.5 mL MeOH for LC-MS analysis. LC-MS analysis was performed as detailed above with a water/MeCN gradient with 0.1% formic acid additive; however, the gradient used was as follows: 0 – 2 min: 5 % MeCN; 2 – 15 min ramp from 5 – 28% MeCN; 15 – 26 min, ramp from 28 – 98% MeCN.

**General Experimental Procedures.** All reactions were performed in single-neck, flame-dried, round-bottomed flasks fitted with rubber septa under a positive pressure of nitrogen unless otherwise noted. Air- and moisture-sensitive liquids were transferred via syringe or stainless steel cannula. Organic solutions were concentrated by rotary evaporation at 28–32 °C.

**Materials.** Commercial solvents and reagents were used as received with the following exceptions. Dichloromethane was purified according to the method of Pangborn et al.<sup>8</sup> 2'-((3-(1-((*S*)-6-((*R*)-4-amino-4-oxo-2-tetradecanamidobutanamido)-3-oxoheptanamido)cyclopropyl)-3-oxopropanamido)methyl)-[2,4'-bithiazole]-4-carboxylic acid (**7**),<sup>7</sup> (*S*)-2'-((4'-(3-((*tert*-butoxycarbonyl)amino)butyl)-3',6'-dioxo-2',3'-dihydrospiro[cyclopropane-1,1'-pyrrolo[3,4-*c*]pyridin]-5'(6'*H*)-yl)methyl)-[2,4'-bithiazole]-4-carboxylic acid (**S1**),<sup>9</sup> and (*S,Z*)-2'-((3-(1-(2-(1-(*tert*-butoxycarbonyl)-5-methylpyrrolidin-2-ylidene)acetamido)cyclopropyl)-3-oxopropanamido)methyl)-[2,4'-bithiazole]-4-carboxylic acid (**S2**)<sup>9</sup> were prepared according to published procedures.

**Instrumentation.** Proton nuclear magnetic resonance spectra (<sup>1</sup>H NMR) were recorded at 600 MHz at 24 °C, unless otherwise noted. Chemical shifts are expressed in parts per million (ppm, δ scale) downfield from tetramethylsilane and are referenced to residual protium in the NMR solvent (C<sub>2</sub>D<sub>6</sub>OS, δ 2.50). Data are represented as follows: chemical shift, multiplicity (s = singlet, d = doublet, t = triplet, q = quartet, m = multiplet and/or multiple resonances, br = broad, app = apparent), coupling constant in Hertz, integration, and assignment. Proton-decoupled carbon nuclear magnetic resonance spectra (<sup>13</sup>C NMR) were recorded at 151 MHz at 24 °C, unless otherwise noted. Chemical shifts are expressed in parts per million (ppm, δ scale) downfield from tetramethylsilane and are referenced to the carbon resonances of the solvent (C<sub>2</sub>D<sub>6</sub>OS, δ 39.5). Signals of protons and carbons were assigned, as far as possible, by using the following two-dimensional NMR spectroscopy techniques: [<sup>1</sup>H, <sup>1</sup>H] COSY (Correlation Spectroscopy), [<sup>1</sup>H, <sup>13</sup>C] HSQC (Heteronuclear Single Quantum Coherence) and long range [<sup>1</sup>H, <sup>13</sup>C] HMBC (Heteronuclear Multiple Bond Connectivity).

## Synthetic Procedures.

### Synthesis of the pyridone **9**:

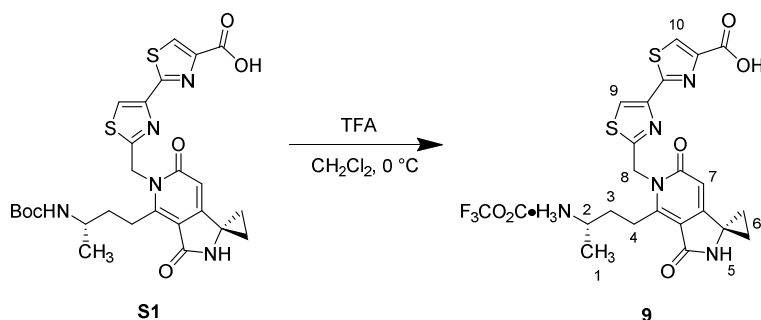

Trifluoroacetic acid (100 μL, 1.36 mmol, 130 equiv) was added dropwise via syringe to a solution of the amide **S1** (6.0 mg, 10.5 μmol, 1 equiv) in dichloromethane (300 μL) at 0 °C. The reaction mixture was stirred for 3 h at 0 °C. The reaction mixture was concentrated to provide the pyridone **9** as a white solid. The product so obtained was used without further purification.

<sup>1</sup>H NMR (600 MHz, DMSO-*d*<sub>6</sub>) δ 8.63 (s, 1H, H<sub>5</sub>), 8.48 (s, 1H, H<sub>10</sub>), 8.30 (s, 1H, H<sub>9</sub>), 7.82 (bs, 3H), 6.24 (s, 1H, H<sub>7</sub>), 5.60 (d, *J* = 16.2 Hz, 1H, H<sub>8</sub>), 5.56 (d, *J* = 16.2 Hz, 1H, H<sub>8</sub>), 3.53 – 3.47 (m, 1H, H<sub>4</sub>), 3.47 – 3.39 (m, 1H, H<sub>4</sub>), 3.35 – 3.21 (m, 1H, H<sub>2</sub>), 1.99 – 1.86 (m, 1H, H<sub>3</sub>), 1.86 – 1.77 (m, 1H, H<sub>3</sub>), 1.40 (app t, *J* = 2.8 Hz, 2H, H<sub>6</sub>), 1.38 (app t, *J* = 2.8 Hz, 2H, H<sub>6</sub>), 1.24 (d, *J* = 6.6 Hz, 3H, H<sub>1</sub>). <sup>13</sup>C NMR (151 MHz, DMSO-*d*<sub>6</sub>) δ 166.9 (C), 166.8 (C), 162.0 (C), 161.9 (C), 161.8 (C), 159.6 (C), 151.6 (C), 148.2 (C), 146.9 (C), 129.1 (CH), 119.3 (CH), 109.9 (C), 103.9 (CH), 46.5 (CH), 44.4 (CH<sub>2</sub>), 39.9 (C), 33.5 (CH<sub>2</sub>), 23.2

(CH<sub>2</sub>), 18.1 (CH<sub>3</sub>), 15.3 (CH<sub>2</sub>), 15.2 (CH<sub>2</sub>). HRMS-Cl (m/z): [M + H]<sup>+</sup> calcd for C<sub>21</sub>H<sub>22</sub>N<sub>5</sub>O<sub>4</sub>S<sub>2</sub>, 472.1108; found, 472.1114.

*Synthesis of the lactam 10:*

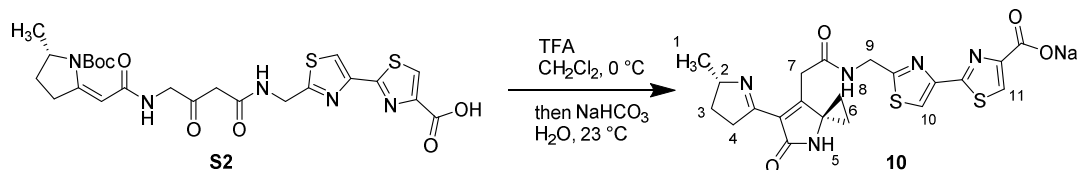

Trifluoroacetic acid (100  $\mu$ L, 1.35 mmol, 133 equiv) was added dropwise via syringe to a solution of the amide **S2** (6.0 mg, 10.2  $\mu$ mol, 1 equiv) in dichloromethane (300  $\mu$ L) at 0 °C. The reaction mixture was stirred for 3 h at 0 °C. The reaction mixture was concentrated. The concentrated reaction mixture was diluted with saturated aqueous sodium bicarbonate solution (200  $\mu$ L). The diluted reaction mixture was stirred for 1 h at 23 °C. The reaction mixture was concentrated. The residue was concentrated from benzene (2  $\times$  300  $\mu$ L) to provide the lactam **10** as a white solid. The product so obtained was used without further purification.

<sup>1</sup>H NMR (600 MHz, DMSO-*d*<sub>6</sub>)  $\delta$  10.30 (t, *J* = 6.0 Hz, 1H, H<sub>8</sub>), 8.65 (bs, 1H, H<sub>5</sub>), 8.43 (s, 1H, H<sub>10</sub>), 7.84 (s, 1H, H<sub>11</sub>), 4.60 (dd, *J* = 6.0, 3.3 Hz, 2H, H<sub>9</sub>), 4.16 – 4.08 (m, 1H, H<sub>2</sub>), 3.32 (d, *J* = 6.7 Hz, 2H, H<sub>7</sub>), 3.10 (dddd, *J* = 18.0, 9.8, 4.7, 2.2 Hz, 1H, H<sub>4</sub>), 2.87 (dddd, *J* = 18.0, 9.9, 7.8, 2.0 Hz, 1H, H<sub>4</sub>), 2.16 – 2.02 (m, 1H, H<sub>3</sub>), 1.76 – 1.63 (m, 2H, H<sub>6</sub>), 1.42 – 1.31 (m, 3H, H<sub>3</sub>, H<sub>6</sub>), 1.19 (d, *J* = 6.7 Hz, 3H, H<sub>1</sub>). <sup>13</sup>C NMR (151 MHz, DMSO-*d*<sub>6</sub>)  $\delta$  170.3 (C), 169.7 (C), 168.4 (C), 168.2 (C), 160.3 (C), 158.8 (C), 157.7 (C), 148.2 (C), 127.4 (C), 121.8 (CH), 117.0 (CH), 66.6 (CH), 45.3 (C), 40.4 (CH<sub>2</sub>), 36.6 (CH<sub>2</sub>), 33.6 (CH<sub>2</sub>), 29.7 (CH<sub>2</sub>), 21.9 (CH<sub>3</sub>), 11.9 (CH<sub>2</sub>), 11.8 (CH<sub>2</sub>). HRMS-Cl (m/z): [M + H]<sup>+</sup> calcd for C<sub>21</sub>H<sub>22</sub>N<sub>5</sub>O<sub>4</sub>S<sub>2</sub>, 472.1108; found, 472.1109.

## Supplemental Tables

**Table S1. Strains and Plasmids**

| Strains                          | Genotype                                                                                                             | Reference                                                            |
|----------------------------------|----------------------------------------------------------------------------------------------------------------------|----------------------------------------------------------------------|
| <i>E. coli</i> DH10B             | F- mcrA _(mcrBC-hsdRMS-mrr) [_80d_lacZ_M15] _lacX74 deoR recA1 endA1 araD139_(ara,leu)7697 galU galK _ rpsL nupG     | Invitrogen                                                           |
| High-efficiency variant of EcNR1 | MG1655 Δ(ybhB-bioAB)::[λcI857 N(cro-pL,bet)::tetR-bla]) mutS::toIC                                                   | Strain provided by the Isaacs lab at Yale. EcNR1 parent <sup>4</sup> |
| <b>Plasmids</b>                  |                                                                                                                      |                                                                      |
| pBAC-empty                       | pBeloBAC11 without insert                                                                                            | ( <sup>3</sup> )                                                     |
| pBAC-PKS                         | genomic fragment of <i>E. coli</i> IHE3034 encoding the complete colibactin <i>pks</i> island cloned into pBeloBAC11 | ( <sup>3</sup> )                                                     |
| pBAC-PKS ClbH G162D              | pBAC-PKS with an inactivating mutation in ClbH-A1                                                                    | This study                                                           |
| pBAC-PKS ClbH H662A              | pBAC-PKS with a non-active site histidine mutated in ClbH-C                                                          | This study                                                           |
| pBAC-PKS ClbH H665A              | pBAC-PKS with an inactivating mutation in ClbH-C                                                                     | This study                                                           |
| pBAC-PKS ClbH G1137D             | pBAC-PKS with an inactivating mutation in ClbH-A2                                                                    | This study                                                           |
| pBAC-PKS ClbH S1524A             | pBAC-PKS with an inactivating mutation in ClbH-T                                                                     | This study                                                           |
| pBAC-PKS ClbI S178A              | pBAC-PKS with an inactivating mutation in ClbI-KS                                                                    | This study                                                           |
| pBAC-PKS ClbI S178C              | pBAC-PKS with an active site mutation to cysteine in ClbI-KS                                                         | This study                                                           |
| pBAC-PKS ClbI S625A              | pBAC-PKS with an inactivating mutation in ClbI-AT                                                                    | This study                                                           |
| pBAC-PKS ClbI S952A              | pBAC-PKS with an inactivating mutation in ClbI-T                                                                     | This study                                                           |
| pBAC-PKS ClbP S95A               | pBAC-PKS with an inactivating mutation in ClbP                                                                       | This study                                                           |
| pBAC-PKS ClbP S95A ClbH G162D    | pBAC-PKS with inactivating mutations in ClbP and ClbH-A1                                                             | This study                                                           |
| pBAC-PKS ClbP S95A ClbH H662A    | pBAC-PKS with an inactivating mutation in ClbP and a non-active site histidine mutated in ClbH-C                     | This study                                                           |
| pBAC-PKS ClbP S95A ClbH H665A    | pBAC-PKS with inactivating mutations in ClbP and ClbH-C                                                              | This study                                                           |
| pBAC-PKS ClbP S95A ClbH G1137D   | pBAC-PKS with inactivating mutations in ClbP and ClbH-A2                                                             | This study                                                           |
| pBAC-PKS ClbP S95A ClbH S1524A   | pBAC-PKS with inactivating mutations in ClbP and ClbH-T                                                              | This study                                                           |
| pBAC-PKS ClbP S95A ClbI S178A    | pBAC-PKS with inactivating mutations in ClbP and ClbI-KS                                                             | This study                                                           |
| pBAC-PKS ClbP S95A ClbI S178C    | pBAC-PKS with an inactivating mutation in ClbP and mutation of ClbI-KS active site to cysteine                       | This study                                                           |
| pBAC-PKS ClbP S95A ClbI S625A    | pBAC-PKS with inactivating mutations in ClbP and ClbI-AT                                                             | This study                                                           |
| pBAC-PKS ClbP S95A ClbI S952A    | pBAC-PKS with inactivating mutations in ClbP and ClbI-T                                                              | This study                                                           |



|                                       |                                                                     |                   |
|---------------------------------------|---------------------------------------------------------------------|-------------------|
| pBAC-PKS ClbP S95A ClbJ H175A         | pBAC-PKS with inactivating mutations in ClbP and ClbJ-C             | This study        |
| pBAC-PKS ClbP S95A ClbJ G650D         | pBAC-PKS with inactivating mutations in ClbP and ClbJ-A1            | This study        |
| pBAC-PKS ClbP S95A ClbJ S1033A        | pBAC-PKS with inactivating mutations in ClbP and ClbJ-T1            | This study        |
| pBAC-PKS ClbP S95A ClbJ D1226A        | pBAC-PKS with inactivating mutations in ClbP and ClbJ-Cy            | This study        |
| pBAC-PKS ClbP S95A ClbJ D1231A        | pBAC-PKS with inactivating mutations in ClbP and ClbJ-Cy            | This study        |
| pBAC-PKS ClbP S95A ClbJ D1226A D1231A | pBAC-PKS with inactivating mutations in ClbP and ClbJ-Cy            | This study        |
| pBAC-PKS ClbP S95A ClbJ G1697A        | pBAC-PKS with inactivating mutations in ClbP and ClbJ-A2            | This study        |
| pBAC-PKS ClbP S95A ClbJ S2095A        | pBAC-PKS with inactivating mutations in ClbP and ClbJ-T2            | This study        |
| pBAC-PKS ClbP S95A ClbK C167A         | pBAC-PKS with inactivating mutations in ClbP and ClbK-KS            | This study        |
| pBAC-PKS ClbP S95A ClbK S747A         | pBAC-PKS with inactivating mutations in ClbP and ClbK-T2            | This study        |
| pBAC-PKS ClbP S95A ClbK D939A         | pBAC-PKS with inactivating mutations in ClbP and ClbK-Cy            | This study        |
| pBAC-PKS ClbP S95A ClbK D944A         | pBAC-PKS with inactivating mutations in ClbP and ClbK-Cy            | This study        |
| pBAC-PKS ClbP S95A ClbK D939A D944A   | pBAC-PKS with inactivating mutations in ClbP and ClbK-Cy            | This study        |
| pBAC-PKS ClbP S95A ClbK G1411A        | pBAC-PKS with inactivating mutations in ClbP and ClbK-A2            | This study        |
| pBAC-PKS ClbP S95A ClbK R1768E        | pBAC-PKS with inactivating mutations in ClbP and ClbK-Ox            | This study        |
| pBAC-PKS ClbP S95A ClbK S1770E        | pBAC-PKS with inactivating mutations in ClbP and ClbK-Ox            | This study        |
| pBAC-PKS ClbP S95A ClbK S2073A        | pBAC-PKS with inactivating mutations in ClbP and ClbK-T2            | This study        |
| pBAC-PKS ClbP S95A ClbL S179A         | pBAC-PKS with inactivating mutations in ClbP and ClbL               | This study        |
| pBAC-PKS ClbP S95A ClbQ S78A          | pBAC-PKS with inactivating mutations in ClbP and ClbQ               | This study        |
| pBAC-PKS ClbP S95A $\Delta clbO$      | pBAC-PKS <i>clbO:FRT</i> with an inactivating mutation in ClbP      | This study        |
| pBAD18                                | Expression vector with araBAD promoter for induction with arabinose | ( <sup>10</sup> ) |
| pPEB018                               | <i>clbP</i> gene cloned into pBAD18                                 | ( <sup>11</sup> ) |

**Table S2. Primers used in this study**

| <b>MAGE Primer</b> | <b>Sequence</b>                                                                                   | <b>Purpose</b>                                    |
|--------------------|---------------------------------------------------------------------------------------------------|---------------------------------------------------|
| clbP-ser-r         | g*g*ctagtcagaaagcgaataactctagacacagtttacgagctgggaGC<br>Gatgagtaaggcgtttaccggacttgggtgcaaatactgat  | Inactivation of ClbP                              |
| ClbH-A1 G162D      | a*t*tatttacacctccGATccaccgggtgccttaaagggtggcgacgg<br>aacatgcagcgtgctaaaccgaattgtctggatgcagaac     | Inactivation of ClbH-A <sub>1</sub>               |
| ClbH-C H665A       | g*t*agcgtattgttattcatctgcacGCCatcatcagtgatggctgctg<br>aaaggcgtttgttacgcgaattgcaggccgcataaacg      | Inactivation of ClbH-C                            |
| ClbH-A2<br>G1137D  | a*a*cctgccagttagttgcccagatgcttttagattgcatgcccgtggtg<br>atctttacctccGATactaccggcagccaaaggcgtc      | Inactivation of ClbH-A <sub>2</sub>               |
| ClbH-T S1524A      | a*a*tttcttgatctcggtggacacGCActtctgctagtagatgcagca<br>atacatcgggcagcagtgccgtcagcacgtggcgttggtt     | Inactivation of ClbH-T                            |
| ClbI-KS S178A      | a*t*cgctatcacctcaacctgcgcggccggcgatcacggctgcagactt<br>ccGCGtcgacatccttgggtggcgtgctgctggcatgcaa    | Inactivation of ClbI-KS                           |
| ClbI-AT S625A      | t*t*gtggctcagttgggaatcacgcaacgtaagtattggtcatGCCc<br>tgggcgaatgggtggcagcgacgttggcaggcgtgttctct     | Inactivation of ClbI-AT                           |
| ClbI-T S952A       | g*a*cggcttgggcattgacgacaacttctcgaagctggcggacatGCG<br>ttgatgctgggcagttgctggcgcaggtacaggaacgggtc    | Inactivation of ClbI-T                            |
| ClbJ-H175A         | a*g*catactgctgctgtaactcatcgaacaatagccgtaacgagatacctg<br>cgatgatgatGGCgtgcgcgcaaaacaccaaatagacaacc | Inactivation of ClbJ-C                            |
| ClbJ-G650D         | a*a*cgcacacgccttttaggttaccgggtactATCGgaggtaaacaacag<br>gtaggcctgcatatccggcaacagcgcgcaaggtgtagaata | Inactivation of ClbJ-A <sub>1</sub>               |
| ClbJ-S1033A        | g*a*tctctgctaccaacgttaccgccaacagTGCatgtcccccaagcg<br>aaagaaatcgactcaggatcgacgtttttatcggcaata      | Inactivation of ClbJ-T <sub>1</sub>               |
| ClbJ-D1226A        | t*a*cagcatcatcaactcctgctgtagcgtgcgcatactcagagcatcggc<br>aatcagcagGGCgagactgaaatgcaagcggccatgttgc  | Inactivation of ClbJ-Cy                           |
| ClbJ-D1231A        | c*a*acatggccgcttgcattcagctcgtatctgattgccGCCgctct<br>gagtatgcccagcgtacagcaggagttgatgatgctgtac      | Inactivation of ClbJ-Cy                           |
| ClbJ-D2            | g*c*acatggccgcttgcatttcaagtcGCCctgctgattgccGCCgc<br>tctgagtatgcccagcgtacagcaggagttgatgatgctgta    | Inactivation of ClbJ-Cy                           |
| ClbJ-G1679D        | t*g*gtcgtatcactccttccgggtaccgggtggaATCGgaagtgaaa<br>atgatataggccagatccgtgacatcccagccactcagcgc     | Inactivation of ClbJ-A <sub>2</sub><br>and ClbK-A |
| ClbJ-S2095A        | c*t*taaaaatctcctcaatacggcgatgcaacagcagcagatcggatGGC<br>gcccggccgcttcaaaaaagttgctcattcagtcgatctg   | Inactivation of ClbJ-T <sub>2</sub>               |
| ClbK-C167A         | c*c*agcaggtggcAGCactggcctgaaccgtcacgcaagggccggt<br>aatattcaggcggtaagccagttgggacgtcaaatgatctttgt   | Inactivation of ClbK-KS                           |
| ClbK-S747A         | g*c*cgtaacgttgctgaatatcatataaaatggttgacgtaacagGGCa<br>tgcccaccagttcgaagaagctggcgtggtgatcatcaat    | Inactivation of ClbK-T <sub>1</sub>               |
| ClbK-D939A         | t*t*cccgaatgaacaactccagactccatgcacggctatcagcagAGC<br>gatagatacatgtagccgggcttttctgctggatcaaccac    | Inactivation of ClbK-Cy                           |
| ClbK-D944A         | g*t*ggttgatccgcagcaaaaagcccggctacatgtatctatcgactgct<br>gatagccGCCgcatggagctggagttgttcattcgggaa    | Inactivation of ClbK-Cy                           |
| ClbK-D2            | g*t*ggttgatccgcagcaaaaagcccggctacatgtatctatGCTctgc<br>tgatagccGCCgcatggagctggagttgttcattcgggaa    | Inactivation of ClbK-Cy                           |
| ClbK-R1768E        | g*a*aatgacgatagctgcgTTCtttgatgtaacgtgtgctatccgccggt<br>gcccgtcagtgcaatgccagaccatccagcgcgcaaatg    | Inactivation of ClbK-Ox                           |
| ClbK-S1770E        | g*g*tttttgcgcgctgaaatgacgataTTCggggcgtttgatgtaacgtg<br>tgctatccggcgtgcccgtcagtgcaatgccagaccatc    | Inactivation of ClbK-Ox                           |
| ClbK-2073A         | c*c*cgataatgcctcaagtgcctgctgaatcgcaccaattctatAGCa<br>ctgccccccagcgagaagaatcgtcttggccgacacgtg      | Inactivation of ClbK-T <sub>2</sub>               |

|               |                                                                                              |                                                   |
|---------------|----------------------------------------------------------------------------------------------|---------------------------------------------------|
| ClbL-S179A    | g*c*ggattcacccccgtggaattggcagcgatttgttggcGCCctgc<br>gcattcccgcacactacacaggtgtctatgcccatcgtgt | Inactivation of ClbL-                             |
| ClbQ-S78A     | g*t*gaacactacacaggtggagactacgccattttgggcatGCCctcg<br>gagggatcatggccttcgaactggcattatattctgat  | Inactivation of ClbQ-                             |
| ClbI-KS S178C | a*t*cgctatcacctcaacctgcgcggccggcgatcacggcagactt<br>ccTGTtcgacatccttggtggcgggtgtgcgtggcatgcaa | Mutation of ClbI-KS<br>active site to cysteine    |
| ClbH-C2 H662A | g*a*tgacgatcgtagcgtattgttattGCgctgcaccacatcatcagtga<br>tggtggcgaaggcgtttgttacgcgaattgcaggcc  | Mutation of His near the<br>active site in ClbH-C |

\* = phosphorothioate linkage

| Screening Primers | Sequence                     | Purpose                                                                |
|-------------------|------------------------------|------------------------------------------------------------------------|
| wt-clb-f          | ggtaaacgccttactcatcga        | Forward primer for ClbP wild type screen                               |
| mut-clb-f         | gtaaacgccttactcatcgc         | Forward primer for ClbP S95A mutagenesis screen                        |
| clb-seq-rB        | atgacaataatggaacacgtagc      | Reverse primer for ClbP screens                                        |
| A1-PCR_WT         | CTGGCGTATATTATTACACCTCCGG    | Forward primer for ClbH-A <sub>1</sub> wild type screen                |
| A1-PCR_MU         | AACTGGCGTATATTATTACACCTCCGA  | Forward primer for ClbH-A <sub>1</sub> G162D mutagenesis screen        |
| A1-PCR_REV        | CTCCAGATACTCGACAAACAGGTTTCAG | Reverse primer for ClbH-A <sub>1</sub> screens                         |
| C-PCR_WT          | GCGTATTGTTGATTCATCTGCACCA    | Forward primer for ClbH-C wild type screen                             |
| C-PCR_MU          | CGTATTGTTGATTCATCTGCACGC     | Forward primer for ClbH-C H665A mutagenesis screen                     |
| C-PCR_REV         | CATGTGTTGGCAGACAATGCG        | Reverse primer for ClbH-C domain screens                               |
| C2-PCR_WT         | ACGATCGTAGCGTATTGTTGATTCAT   | Forward primer for noncatalytic His in ClbH-C wild type screen         |
| C2-PCR_MU         | GATCGTAGCGTATTGTTGATTGCG     | Forward primer for noncatalytic His in ClbH-C H662A mutagenesis screen |
| A2-PCR_WT         | CGGTGGTGATCTTTACCTCCGG       | Forward primer for ClbH-A <sub>2</sub> wild type screen                |
| A2-PCR_MU         | CGGTGGTGATCTTTACCTCCGA       | Forward primer for ClbH-A <sub>2</sub> G1137D mutagenesis screen       |
| A2-PCR_REV        | CACAGAGAGGCTGGCAGAAAGC       | Reverse primer for ClbH-A <sub>2</sub> screens                         |
| T-PCR_WT          | ATTTCTTCGATCTCGGTGGACACT     | Forward primer for ClbH-T wild type screen                             |
| T-PCR_MU          | TCTTCGATCTCGGTGGACACG        | Forward primer for ClbH-T S1697A mutagenesis screen                    |
| T-PCR_REV         | CAGTGATGACTGTCGGTTGTGGC      | Reverse primer for ClbH-T mutagenesis screens                          |
| KS_WT             | GATCACGGTGCAGACTTCCTCA       | Forward primer for ClbI-KS mutations (WT rxns)                         |
| KS-A_MU           | ACGGTGCAGACTTCGCG            | Forward primer for ClbI-KS S178A mutation                              |

|             |                              |                                                                                     |
|-------------|------------------------------|-------------------------------------------------------------------------------------|
| KS-C_MU     | GATCACGGTGCAGACTTCCTGT       | Forward primer for ClbI-KS S178C mutation                                           |
| ClbI-KS_rev | TATAACTGATCTTCTCCGAACCGTCG   | Reverse primer for ClbI-KS mutagenesis screen                                       |
| ClbI-AT_WT  | CCAACGGTAATGATTGGTCATTCG     | Forward primer for ClbI-AT wild type screen                                         |
| ClbI-AT_MU  | CAACGGTAATGATTGGTCATGCC      | Forward primer for ClbI-AT S625A mutagenesis screen                                 |
| ClbI-AT_rev | CTTGCATCATGCTAGAGTGGAAGG     | Reverse primer for ClbI-AT screens                                                  |
| ClbI-T_WT   | CGAAGCTGGCGGACATTCA          | Forward primer for ClbI-T wild type screen                                          |
| ClbI-T_MU   | GAAGCTGGCGGACATGCG           | Forward primer for ClbI-T S952A mutagenesis screen                                  |
| ClbI-T_rev  | CCTGATTGCGCCAACGTGTCG        | Reverse primer for ClbI-T screens                                                   |
| ClbJ-C_WT   | GTAACGAGATACCGTCGATGATGATATG | Forward primer for ClbJ-C wild type screen                                          |
| ClbJ-C_MU   | GAGATACCGTCGATGATGATGGC      | Forward primer for ClbJ-C H175A mutagenesis screen                                  |
| ClbJ-C_rev  | GTATCGTTTGCATGGCGTGGTG       | Reverse primer for ClbJ-C screens                                                   |
| ClbJ-A1_WT  | GCCTTTAGGTTACCGGTACTGC       | Forward primer for ClbJ-A <sub>1</sub> wild type screen                             |
| ClbJ-A1_MU  | ACGCCTTTAGGTTACCGGTACTAT     | Forward primer for ClbJ- A <sub>1</sub> G650D mutagenesis screen                    |
| ClbJ-A1_rev | GATGCGTTTTTCGAGCGCATG        | Reverse primer for ClbJ- A <sub>1</sub> screens                                     |
| ClbJ-T1_WT  | CGTTACCGCCAACAGCGA           | Forward primer for ClbJ-T <sub>1</sub> wild type screen                             |
| ClbJ-T1_MU  | AACGTTACCGCCAACAGTGC         | Forward primer for ClbJ- T <sub>1</sub> S1033A mutagenesis screen                   |
| ClbJ-T1_rev | GAGCACCGTTACACAAAGCACTG      | Reverse primer for ClbJ- T <sub>1</sub> screens                                     |
| ClbJ-Cy_WT  | AGAGCATCGGCAATCAGCAGAT       | Forward primer for ClbJ-Cy D1226 screen                                             |
| ClbJ-Cy_MU  | GCATCGGCAATCAGCAGGG          | Forward primer for ClbJ-Cy D1226A mutagenesis screen                                |
| ClbJ-Cy_rev | CGACCCACATCTACCATGAATTTG     | Reverse primer for ClbJ-Cy screens                                                  |
| J1231A_WT   | gtctcgatctgctgattgcccgat     | Forward primer for ClbJ-Cy D1231 screen                                             |
| J1231A_MU   | CGATCTGCTGATTGCCGCC          | Forward primer for ClbJ-Cy D1231A mutagenesis screen                                |
| ClbJ-A2_WT  | CGGGGTACCGGTGGAGC            | Forward primer for ClbJ-A <sub>2</sub> and ClbK-A wild type screens                 |
| ClbJ-A2_MU  | TTCGGGGTACCGGTGGAAT          | Forward primer for ClbJ-A <sub>2</sub> G1697D and ClbK-A G1411D mutagenesis screens |
| ClbJ-A2_rev | gggtaaatagttctctggcgctg      | Reverse primer for ClbJ-A <sub>2</sub>                                              |

|             |                              |                                                                  |
|-------------|------------------------------|------------------------------------------------------------------|
|             |                              | screens                                                          |
| ClbJ-T2_WT  | GCAACAGCACGATCTGGATTGA       | Forward primer for ClbJ-T <sub>2</sub> wild type screen          |
| ClbJ-T2_MU  | CAACAGCACGATCTGGATGGC        | Forward primer for ClbJ-T <sub>2</sub> S2095A mutagenesis screen |
| ClbJ-T2_rev | CAGAAAACCTGCATCCTGACGATAC    | Reverse primer for ClbJ-T <sub>2</sub> screens                   |
| ClbK-KS_WT  | CCACCAGCGAGGTGGCACA          | Forward primer for ClbK-KS wild type screen                      |
| ClbK-KS_MU  | CCACCAGCGAGGTGGCAGC          | Forward primer for ClbK-KS C167A mutagenesis screen              |
| ClbK-KS_rev | gctacagccgtgcagaagcag        | Reverse primer for ClbK-KS screens                               |
| ClbK-T1_WT  | CATATAAAATGGTTGACGCTAACAGCGA | Forward primer for ClbK-T <sub>1</sub> wild type screen          |
| ClbK-T1_MU  | CATATAAAATGGTTGACGCTAACAGGGC | Forward primer for ClbK-T <sub>1</sub> S747A mutagenesis screen  |
| ClbK-T1_rev | cccgatgtctgctctttgatgct      | Reverse primer for ClbK-T <sub>1</sub> screens                   |
| ClbK-Cy_WT  | TGCATCGGCTATCAGCAGGT         | Forward primer for ClbK-Cy D939 wild type screen                 |
| ClbK-Cy_MU  | ATGCATCGGCTATCAGCAGAG        | Forward primer for ClbK-Cy D939A mutagenesis screen              |
| ClbK-Cy_rev | CCACCCATATCTATGTGGAATATGAAC  | Reverse primer for ClbK-Cy screens                               |
| K944_WT     | GTATCTATCGACCTGCTGATAGCCGAT  | Forward primer for ClbK-Cy D944 wild type screen                 |
| K944_MU     | TCGACCTGCTGATAGCCGCC         | Forward primer for ClbK-Cy D944 mutagenesis screen               |
| ClbK-A_rev  | CTCAAGATGTGCTGGCGCTG         | Reverse primer for ClbK-A G1411D screens                         |
| ClbK-OXr_WT | AATGACGATAGCTGCGGCG          | Forward primer for ClbK-OX R1768 wild type screen                |
| ClbK-OXr_MU | CGAATGACGATAGCTGCGTTC        | Forward primer for ClbK-OX R1768E mutagenesis screen             |
| ClbK-OX_rev | GAATGGTTACCGTATCGAACTGGG     | Reverse primer for ClbK-OX screens                               |
| ClbK-OXs_WT | CGCGCTGAAATGACGATAGCT        | Forward primer for ClbK-OX S1770 wild type screen                |
| ClbK-OXs_MU | GCGCGCTGAAATGACGATATTC       | Forward primer for ClbK-OX S1770E mutagenesis screen             |
| ClbK-T2_WT  | CCTGCTGAATACGCACCAATTCTATAGA | Forward primer for ClbK-T <sub>2</sub> wild type screen          |
| ClbK-T2_MU  | CTGCTGAATACGCACCAATTCTATAGC  | Forward primer for ClbK-T <sub>2</sub> S2073A mutagenesis screen |
| ClbK-T2_rev | GAGAAACCGAAGGAAACCGCTG       | Reverse primer for ClbK-T <sub>2</sub> screens                   |
| L179-WT     | GGCAGCGATTTGTTTGGCTCA        | Forward primer for ClbL wild type screen                         |
| L179-MU     | CAGCGATTTGTTTGGCGCC          | Forward primer for ClbL                                          |

|                 |                                                                                   |                                                 |
|-----------------|-----------------------------------------------------------------------------------|-------------------------------------------------|
|                 |                                                                                   | S179A mutagenesis screen                        |
| L179-rev        | CGCTGTGCGATCTGTTGATCTATCTC                                                        | Reverse primer for ClbL screens                 |
| Q78-WT          | GAGACTACGCCATTTTTGGGCATAGT                                                        | Forward primer for ClbQ wild type screen        |
| Q78-MU          | CGCCATTTTTGGGCATGCC                                                               | Forward primer for ClbQ S78A mutagenesis screen |
| Q78-rev         | CACGATCGGACAGGTTAATGTGC                                                           | Reverse primer for ClbQ screens                 |
| prPE141         | GTCCGACAGCACGCTACGC                                                               | forward primer for <i>clbP</i> overspanning PCR |
| prPE142         | CAAATCAGCGACACTGAATAC                                                             | reverse primer for <i>clbP</i> overspanning PCR |
| clbH-5P         | gtaaaaaattacatgtctgaacagcaaggattatgagacagttg                                      | Forward primer for <i>clbH</i> overspanning PCR |
| ClbH-3E         | gtaaaaaattgaattcttagtggtggtggtggtggtgatgactg<br>tcggtgtggtgc                      | Reverse primer for <i>clbH</i> overspanning PCR |
| pEClbI-NdeI-5'  | gtaaaatCATATGGCAGAGAATGATTTTGGT<br>ATAGCTATC                                      | Forward primer for <i>clbI</i> overspanning PCR |
| pEClbI-AatII-3' | gtaaaatGACGTCTCATTTTTCAAACGCGG<br>ATGGCTCCAGCCGCCCTCATTAATCATG<br>TCGTAACTAGCACGG | Reverse primer for <i>clbI</i> overspanning PCR |
| ClbJ-5'         | ATGACGATACATCATGCCGCATTG                                                          | Forward primer for <i>clbJ</i> overspanning PCR |
| ClbJ-3'         | TTAACGCTGACGCTGGTGACG                                                             | Reverse primer for <i>clbJ</i> overspanning PCR |
| ClbK-5'_2       | CGTCACCAGCGTCAGCGTTAAG                                                            | Forward primer for <i>clbK</i> overspanning PCR |
| ClbK-3'_2       | GTCCCTGCGCTACGATAGCTCTG                                                           | Reverse primer for <i>clbK</i> overspanning PCR |
| ClbL-5'         | gtaaaaaatGCTAGCAAGAAGGAGATATACCA<br>TGAGTGAGCAGAGCTATCGTAGCG                      | Forward primer for <i>clbL</i> overspanning PCR |
| ClbL-3'         | gtaaaaaatTCTAGACTAGTACCCTTCCGGTAC<br>CGTGAATC                                     | Reverse primer for <i>clbL</i> overspanning PCR |
| clbQ-5          | gtaaaaaattcatatgagtaatatcagtttgattgttgccatattc                                    | Forward primer for <i>clbQ</i> overspanning PCR |
| ClbQ-3          | gtaaaaaattctcgagttagtggtggtggtggtggtgcctactatt<br>cgagtgattcaatcgtct              | Reverse primer for <i>clbQ</i> overspanning PCR |
| clbO-KO5        | gactataaacacgatgccaacccttaaggaataacaacatgtag<br>gctggagctgcttc                    | Forward primer for <i>clbO</i> deletion         |
| clbO-KO3        | ccattattgtcatctgtgaacacctataaaataccatcattccggg<br>gatccgctgacc                    | Reverse primer for <i>clbO</i> deletion         |
| clbO-S5         | agttaaatattgcgcgctcggc                                                            | Forward primer for <i>clbO</i> overspanning PCR |
| clbO-S3         | acacttacggaaagggtgggac                                                            | Reverse primer for <i>clbO</i> overspanning PCR |

**Table S3. Known colibactin-dependent metabolites**

| Neutral Mass                 | Structure                                                                            | Reference         |
|------------------------------|--------------------------------------------------------------------------------------|-------------------|
| <p><b>1</b><br/>566.3679</p> | 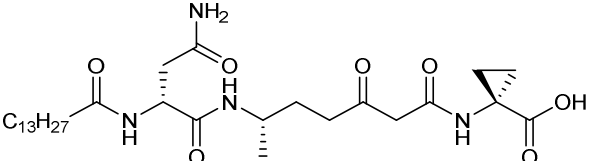   | <p>12</p>         |
| <p><b>2</b><br/>546.3781</p> |    | <p>12-13</p>      |
| <p><b>3</b><br/>712.3618</p> |    | <p>7, 14</p>      |
| <p><b>4</b><br/>714.3775</p> |  | <p>This study</p> |
| <p><b>5</b><br/>795.3448</p> |  | <p>7, 13b, 14</p> |

|                               |                                                                                      |                                                     |
|-------------------------------|--------------------------------------------------------------------------------------|-----------------------------------------------------|
| <p><b>6</b><br/>886.3717</p>  | 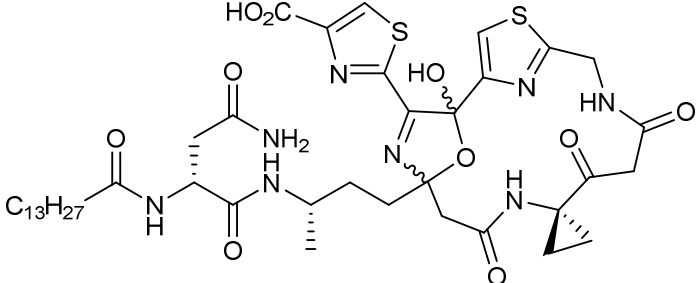   | <p>Structure -<br/>15<br/>Labeling -<br/>12, 15</p> |
| <p><b>7</b><br/>831.3659</p>  |    | <p>This study</p>                                   |
| <p><b>8</b><br/>813.3554</p>  |    | <p>This study</p>                                   |
| <p><b>9</b><br/>471.1035</p>  |    | <p>MS - 7,<br/>Structure -<br/>This study</p>       |
| <p><b>10</b><br/>471.1035</p> |  | <p>This study</p>                                   |
| <p><b>11</b><br/>342.2519</p> |   | <p>11, 16</p>                                       |
| <p><b>12</b><br/>489.1141</p> |  | <p>This study</p>                                   |



|                                |                                                                                      |                |
|--------------------------------|--------------------------------------------------------------------------------------|----------------|
| <p><b>S3</b><br/>340.2362</p>  | 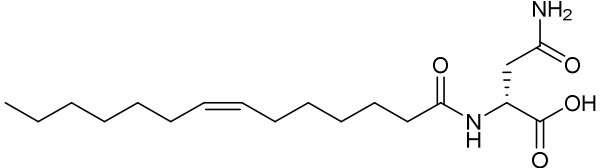   | <p>11</p>      |
| <p><b>S4</b><br/>314.2206</p>  |     | <p>11, 17</p>  |
| <p><b>S5</b><br/>370.2832</p>  |     | <p>11, 16b</p> |
| <p><b>S6</b><br/>368.2675</p>  |     | <p>11, 16b</p> |
| <p><b>S7</b><br/>312.2049</p>  |    | <p>17</p>      |
| <p><b>S8</b><br/>286.1893</p>  |   | <p>17</p>      |
| <p><b>S9</b><br/>441.3203</p>  |  | <p>11, 13a</p> |
| <p><b>S10</b><br/>439.3046</p> |  | <p>12</p>      |
| <p><b>S11</b><br/>483.3308</p> |  | <p>11</p>      |

|                                |                                                                                      |           |
|--------------------------------|--------------------------------------------------------------------------------------|-----------|
| <p><b>S12</b><br/>439.3410</p> | 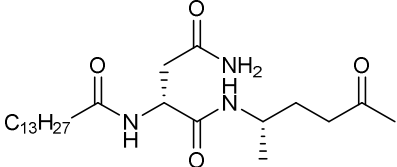   | <p>11</p> |
| <p><b>S13</b><br/>437.3254</p> |    | <p>12</p> |
| <p><b>S14</b><br/>467.3723</p> |    | <p>12</p> |
| <p><b>S15</b><br/>465.3567</p> |    | <p>12</p> |
| <p><b>S16</b><br/>507.3308</p> |   | <p>12</p> |
| <p><b>S17</b><br/>505.3152</p> |  | <p>12</p> |
| <p><b>S18</b><br/>608.3785</p> |  | <p>12</p> |
| <p><b>S19</b><br/>564.3887</p> |  | <p>14</p> |
| <p><b>S20</b><br/>544.3625</p> |  | <p>12</p> |

|                                |                                                                                     |                       |
|--------------------------------|-------------------------------------------------------------------------------------|-----------------------|
| <p><b>S21</b><br/>518.3468</p> | 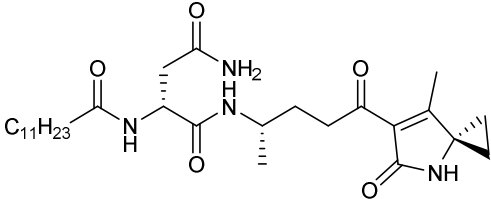  | <p>12</p>             |
| <p><b>S22</b><br/>571.3734</p> |   | <p>14</p>             |
| <p><b>S23</b><br/>629.3788</p> |   |                       |
| <p><b>S24</b><br/>815.3710</p> |  | <p>7</p>              |
| <p><b>S25</b><br/>97.0891</p>  |  | <p>11</p>             |
| <p><b>S26</b><br/>222.1368</p> |  | <p>12, this study</p> |
| <p><b>S27</b><br/>204.1263</p> |  | <p>12, this study</p> |

**Table S4. Multidomain signatures of colbactin-dependent metabolites in a wild-type ClbP background**

| <i>m/z</i> | RT  | Multidomain signature                                                                                                                                  | Structure |
|------------|-----|--------------------------------------------------------------------------------------------------------------------------------------------------------|-----------|
| 205.1338   | 0.9 | <p style="text-align: center;"><b>205.1338</b></p> <p style="text-align: center;">Normalized abundance</p> <p style="text-align: center;">Genotype</p> | S27       |
| 223.1444   | 0.9 | <p style="text-align: center;"><b>223.1444</b></p> <p style="text-align: center;">Normalized abundance</p> <p style="text-align: center;">Genotype</p> | S26       |
| 260.2223   |     | <p style="text-align: center;"><b>260.2223</b></p> <p style="text-align: center;">Normalized abundance</p> <p style="text-align: center;">Genotype</p> |           |

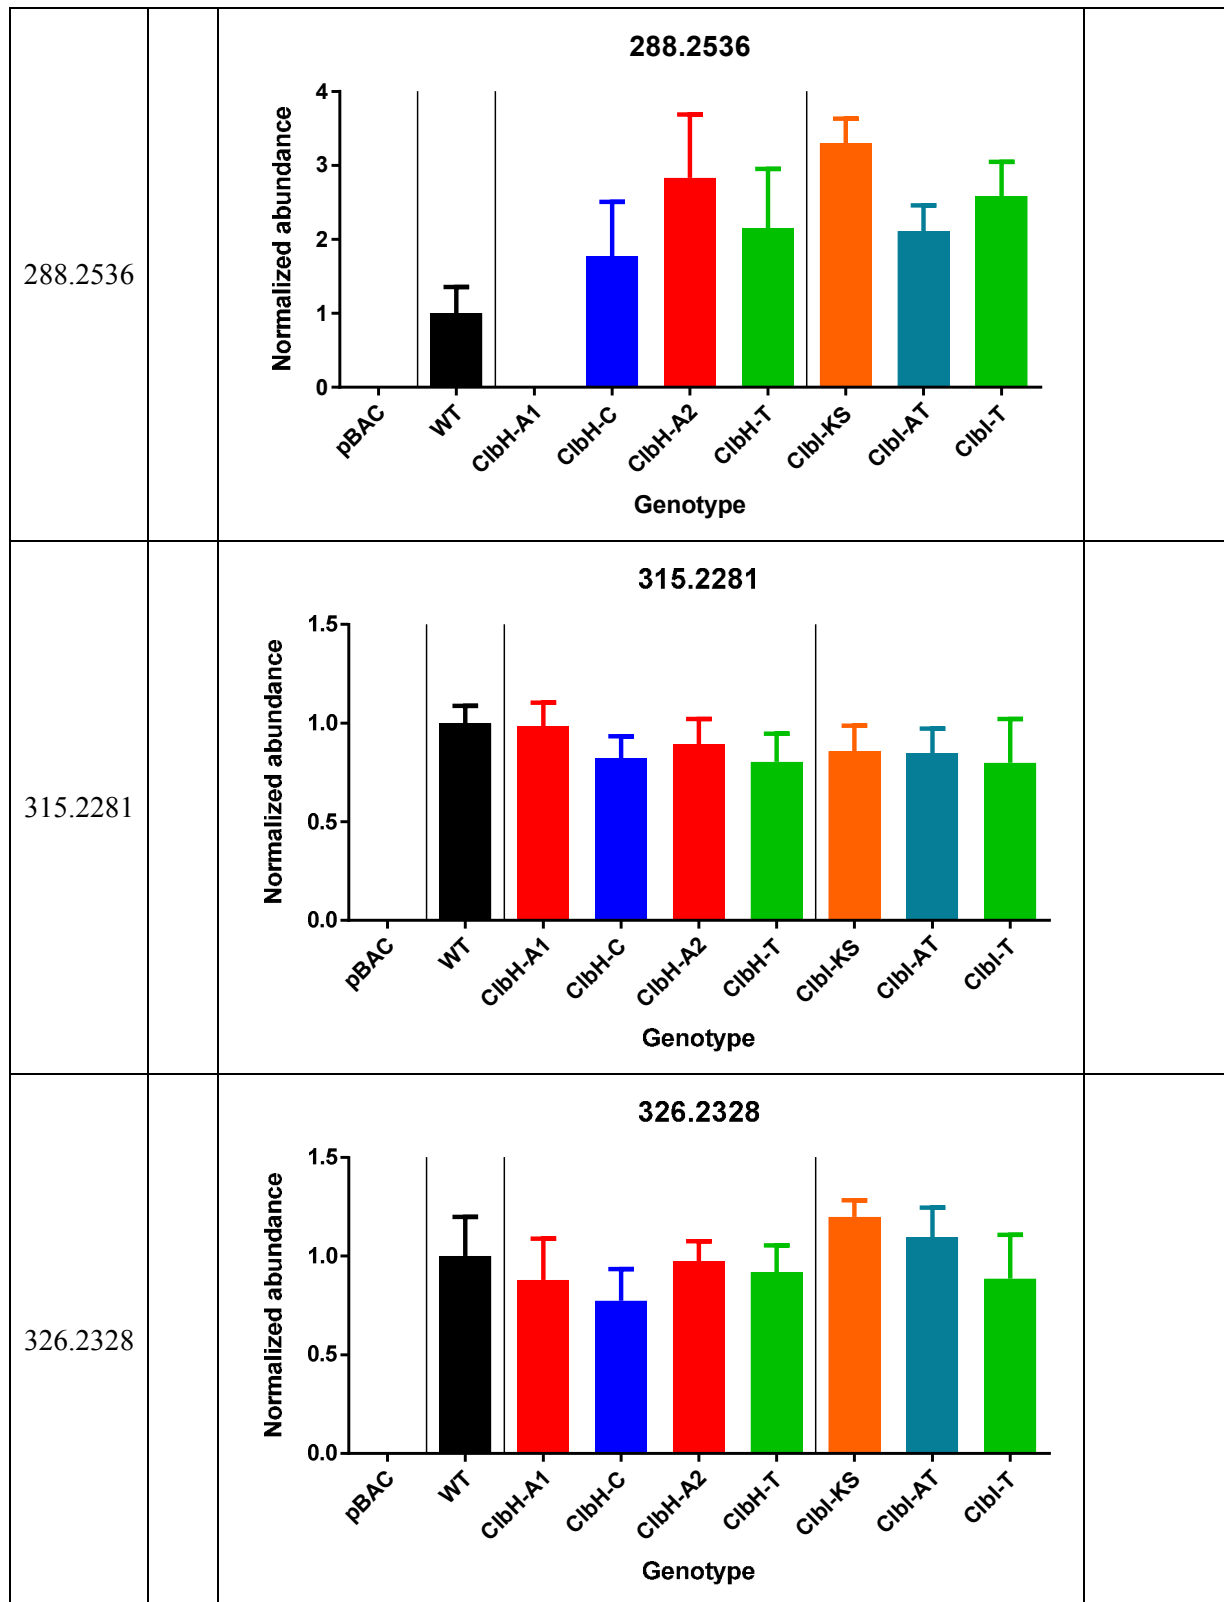

|          |                                                                                                                                                        |    |
|----------|--------------------------------------------------------------------------------------------------------------------------------------------------------|----|
| 341.2440 | <p style="text-align: center;"><b>341.2440</b></p> <p style="text-align: center;">Normalized abundance</p> <p style="text-align: center;">Genotype</p> |    |
| 343.2592 | <p style="text-align: center;"><b>343.2592</b></p> <p style="text-align: center;">Normalized abundance</p> <p style="text-align: center;">Genotype</p> | S1 |
| 369.3748 | <p style="text-align: center;"><b>369.3748</b></p> <p style="text-align: center;">Normalized abundance</p> <p style="text-align: center;">Genotype</p> |    |

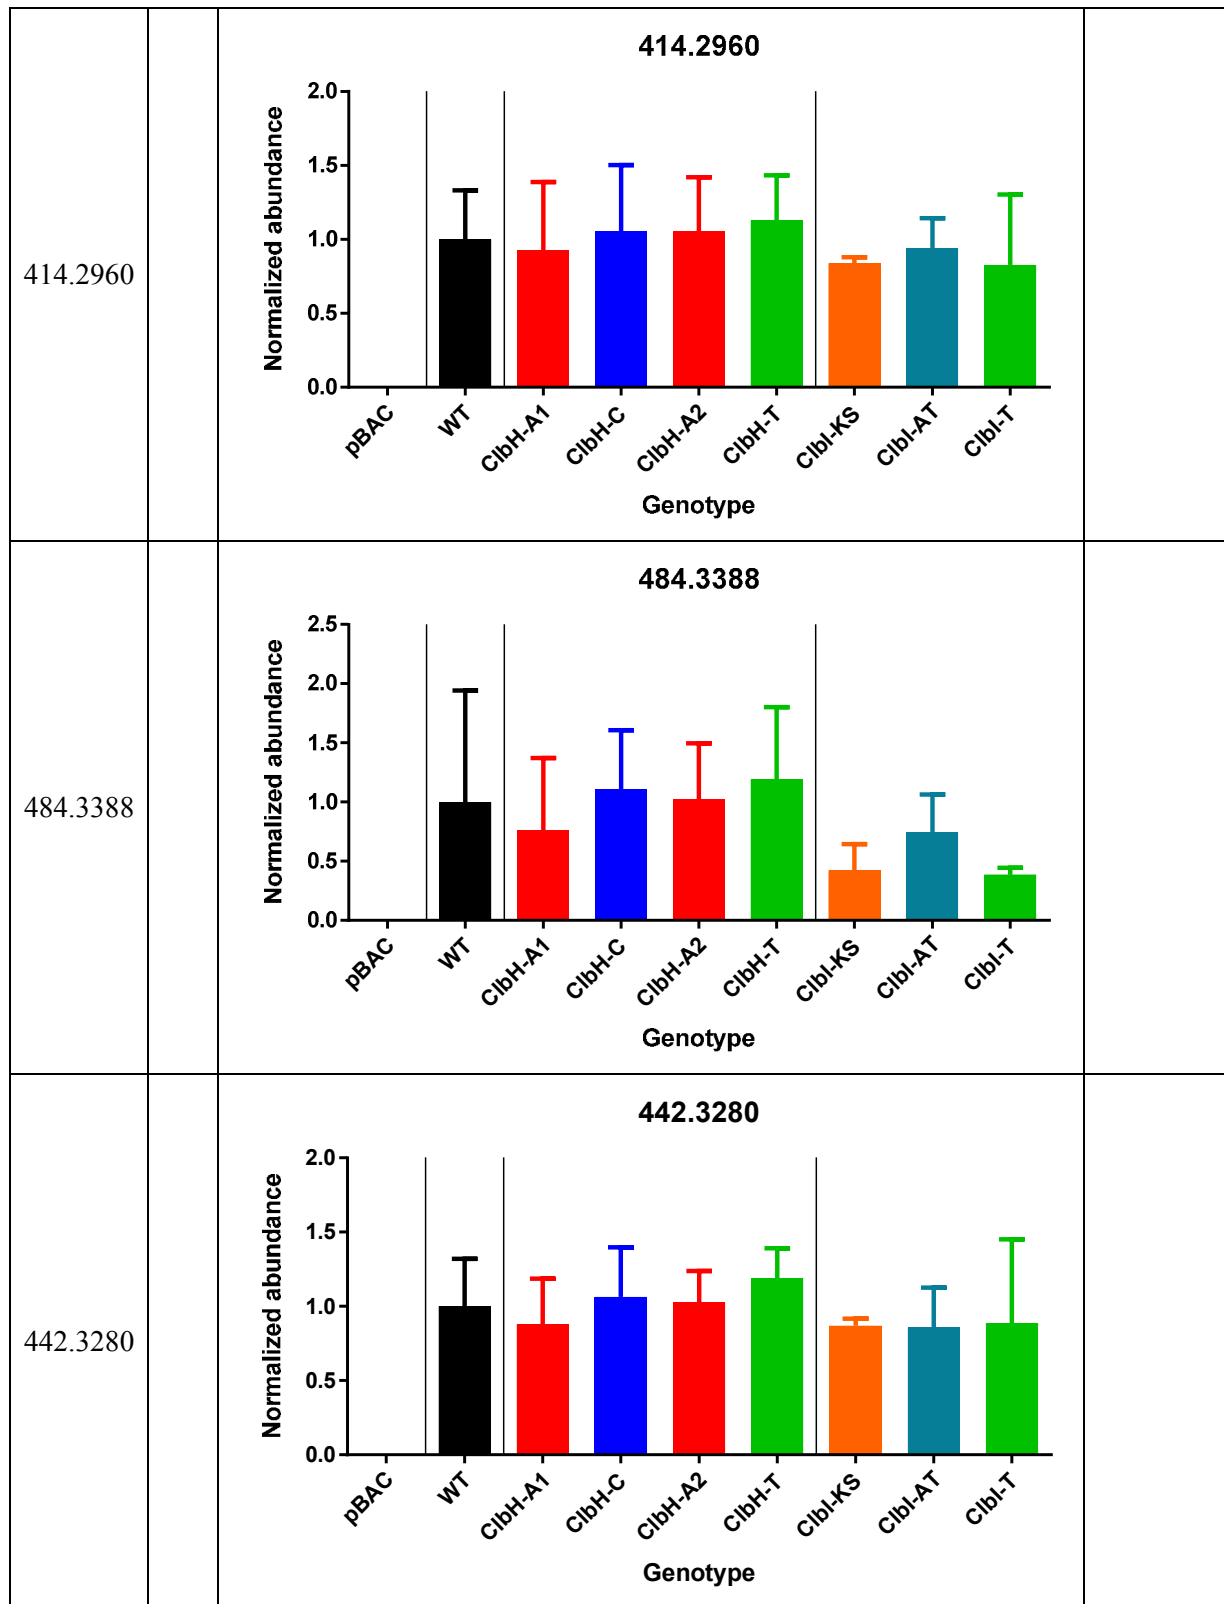

**Table S5. Multidomain signatures of colbacin-dependent metabolites in a C1bP S95A background**

| <i>m/z</i> | RT   | Multidomain signature                                                                                                                                  | Structure |
|------------|------|--------------------------------------------------------------------------------------------------------------------------------------------------------|-----------|
| 343.2592   | 16.9 | <p style="text-align: center;"><b>343.2592</b></p> <p style="text-align: center;">Normalized abundance</p> <p style="text-align: center;">Genotype</p> | 11        |
| 386.2650   | 14.3 | <p style="text-align: center;"><b>386.2650</b></p> <p style="text-align: center;">Normalized abundance</p> <p style="text-align: center;">Genotype</p> |           |
| 412.2806   | 15.2 | <p style="text-align: center;"><b>412.2806</b></p> <p style="text-align: center;">Normalized abundance</p> <p style="text-align: center;">Genotype</p> |           |



|          |      |                                                                                                                                                                                            |  |
|----------|------|--------------------------------------------------------------------------------------------------------------------------------------------------------------------------------------------|--|
| 412.3168 | 17.5 | <p style="text-align: center;"><b>412.3168</b></p> 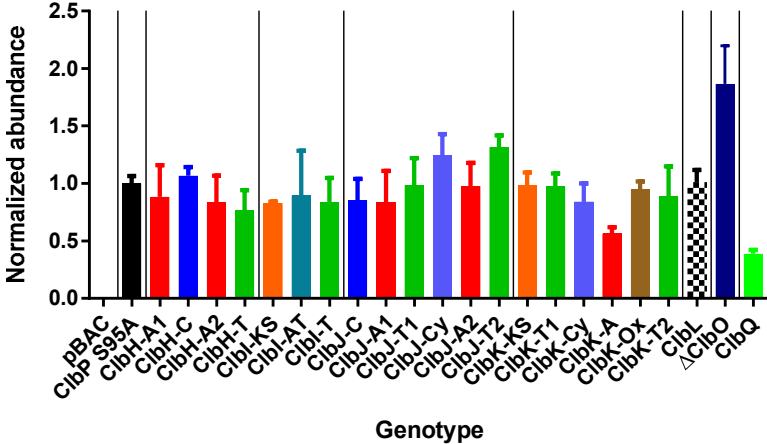 <p style="text-align: center;"><b>Genotype</b></p>   |  |
| 414.2960 | 14.5 | <p style="text-align: center;"><b>414.2960</b></p>  <p style="text-align: center;"><b>Genotype</b></p>  |  |
| 414.2960 | 16.4 | <p style="text-align: center;"><b>414.2960</b></p>  <p style="text-align: center;"><b>Genotype</b></p> |  |

|          |      |                                                                                                                                                        |     |
|----------|------|--------------------------------------------------------------------------------------------------------------------------------------------------------|-----|
| 434.2991 | 15.5 | <p style="text-align: center;"><b>434.2991</b></p> <p style="text-align: center;">Normalized abundance</p> <p style="text-align: center;">Genotype</p> |     |
| 438.3326 | 16.4 | <p style="text-align: center;"><b>438.3326</b></p> <p style="text-align: center;">Normalized abundance</p> <p style="text-align: center;">Genotype</p> |     |
| 440.3485 | 17.7 | <p style="text-align: center;"><b>440.3485</b></p> <p style="text-align: center;">Normalized abundance</p> <p style="text-align: center;">Genotype</p> | S12 |

|          |      |                                                                                                                                                        |     |
|----------|------|--------------------------------------------------------------------------------------------------------------------------------------------------------|-----|
| 442.3280 | 16.6 | <p style="text-align: center;"><b>442.3280</b></p> <p style="text-align: center;">Normalized abundance</p> <p style="text-align: center;">Genotype</p> | S9  |
| 466.3650 | 18.4 | <p style="text-align: center;"><b>466.365</b></p> <p style="text-align: center;">Normalized abundance</p> <p style="text-align: center;">Genotype</p>  | S15 |
| 468.3791 | 18.6 | <p style="text-align: center;"><b>468.3791</b></p> <p style="text-align: center;">Normalized abundance</p> <p style="text-align: center;">Genotype</p> | S14 |

|          |      |                                                                                                                                                                                                                                             |     |
|----------|------|---------------------------------------------------------------------------------------------------------------------------------------------------------------------------------------------------------------------------------------------|-----|
| 480.3069 | 14.7 | <p style="text-align: center;"><b>480.3069</b></p> 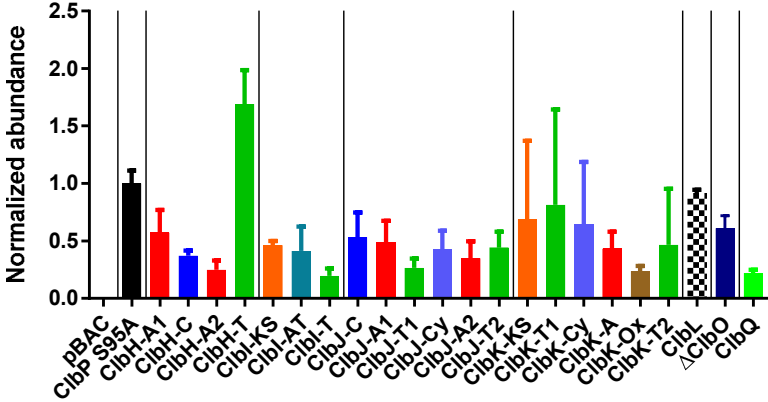 <p style="text-align: center;">Normalized abundance</p> <p style="text-align: center;">Genotype</p>   |     |
| 484.3388 | 16.7 | <p style="text-align: center;"><b>484.3388</b></p>  <p style="text-align: center;">Normalized abundance</p> <p style="text-align: center;">Genotype</p>  | S11 |
| 486.3538 | 15.9 | <p style="text-align: center;"><b>486.3538</b></p>  <p style="text-align: center;">Normalized abundance</p> <p style="text-align: center;">Genotype</p> |     |

|          |      |                                                                                                                                                        |     |
|----------|------|--------------------------------------------------------------------------------------------------------------------------------------------------------|-----|
| 519.3539 | 15.4 | <p style="text-align: center;"><b>519.3539</b></p> <p style="text-align: center;">Normalized abundance</p> <p style="text-align: center;">Genotype</p> | S21 |
| 545.3696 | 16.2 | <p style="text-align: center;"><b>545.3696</b></p> <p style="text-align: center;">Normalized abundance</p> <p style="text-align: center;">Genotype</p> | S20 |
| 547.3854 | 17.4 | <p style="text-align: center;"><b>547.3854</b></p> <p style="text-align: center;">Normalized abundance</p> <p style="text-align: center;">Genotype</p> | 2   |

|          |      |                                                                                                                                                                                                                                             |     |
|----------|------|---------------------------------------------------------------------------------------------------------------------------------------------------------------------------------------------------------------------------------------------|-----|
| 563.3796 | 15.7 | <p style="text-align: center;"><b>563.3796</b></p> 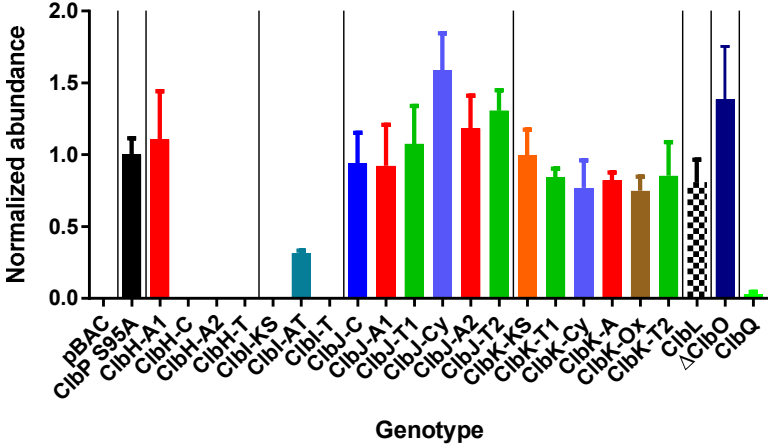 <p style="text-align: center;">Normalized abundance</p> <p style="text-align: center;">Genotype</p>   |     |
| 565.3960 | 16.9 | <p style="text-align: center;"><b>565.3960</b></p>  <p style="text-align: center;">Normalized abundance</p> <p style="text-align: center;">Genotype</p>  | S19 |
| 567.3752 | 16.7 | <p style="text-align: center;"><b>567.3752</b></p>  <p style="text-align: center;">Normalized abundance</p> <p style="text-align: center;">Genotype</p> | 1   |

|           |      |                                                                                                                                                                      |            |
|-----------|------|----------------------------------------------------------------------------------------------------------------------------------------------------------------------|------------|
| 573.3646  | 17.2 | <p style="text-align: center;"><b>573.3646</b></p> <p style="text-align: center;"><b>Normalized abundance</b></p> <p style="text-align: center;"><b>Genotype</b></p> |            |
| 609.3858  | 16.4 | <p style="text-align: center;"><b>609.3858</b></p> <p style="text-align: center;"><b>Normalized abundance</b></p> <p style="text-align: center;"><b>Genotype</b></p> | <b>S18</b> |
| 630.3861* | 15.7 | <p style="text-align: center;"><b>630.3861</b></p> <p style="text-align: center;"><b>Normalized abundance</b></p> <p style="text-align: center;"><b>Genotype</b></p> |            |

|           |      |                                                                                                                                                        |   |
|-----------|------|--------------------------------------------------------------------------------------------------------------------------------------------------------|---|
| 648.3967* | 15.5 | <p style="text-align: center;"><b>648.3967</b></p> <p style="text-align: center;">Normalized abundance</p> <p style="text-align: center;">Genotype</p> |   |
| 711.3534  | 15.2 | <p style="text-align: center;"><b>711.3534</b></p> <p style="text-align: center;">Normalized abundance</p> <p style="text-align: center;">Genotype</p> |   |
| 713.3691  | 16.2 | <p style="text-align: center;"><b>713.3691</b></p> <p style="text-align: center;">Normalized abundance</p> <p style="text-align: center;">Genotype</p> | 3 |



|           |      |                                                                                                                                                                      |   |
|-----------|------|----------------------------------------------------------------------------------------------------------------------------------------------------------------------|---|
| 715.3847* | 16.2 | <p style="text-align: center;"><b>715.3847</b></p> <p style="text-align: center;"><b>Normalized abundance</b></p> <p style="text-align: center;"><b>Genotype</b></p> | 4 |
| 731.3797* | 15.5 | <p style="text-align: center;"><b>731.3797</b></p> <p style="text-align: center;"><b>Normalized abundance</b></p> <p style="text-align: center;"><b>Genotype</b></p> |   |
| 733.3953* | 16.0 | <p style="text-align: center;"><b>733.3953</b></p> <p style="text-align: center;"><b>Normalized abundance</b></p> <p style="text-align: center;"><b>Genotype</b></p> |   |

|           |      |                                                                                                                                                        |   |
|-----------|------|--------------------------------------------------------------------------------------------------------------------------------------------------------|---|
| 733.3953* | 16.2 | <p style="text-align: center;"><b>733.3953</b></p> <p style="text-align: center;">Normalized abundance</p> <p style="text-align: center;">Genotype</p> |   |
| 749.3906  | 15.9 | <p style="text-align: center;"><b>749.3906</b></p> <p style="text-align: center;">Normalized abundance</p> <p style="text-align: center;">Genotype</p> |   |
| 796.3521  | 16.1 | <p style="text-align: center;"><b>796.3521</b></p> <p style="text-align: center;">Normalized abundance</p> <p style="text-align: center;">Genotype</p> | 5 |

|           |      |                                                                                                       |     |
|-----------|------|-------------------------------------------------------------------------------------------------------|-----|
| 814.3573* | 15.6 | <p style="text-align: center;"><b>814.3626</b></p> <p style="text-align: center;"><b>Genotype</b></p> |     |
| 814.3573* | 16.0 | <p style="text-align: center;"><b>814.3626</b></p> <p style="text-align: center;"><b>Genotype</b></p> | 8   |
| 816.3783  | 16.7 | <p style="text-align: center;"><b>816.3783</b></p> <p style="text-align: center;"><b>Genotype</b></p> | S24 |

|           |      |                                                                                                                                                                                                                                             |   |
|-----------|------|---------------------------------------------------------------------------------------------------------------------------------------------------------------------------------------------------------------------------------------------|---|
| 832.3732* | 16.2 | <p style="text-align: center;"><b>832.3732</b></p> 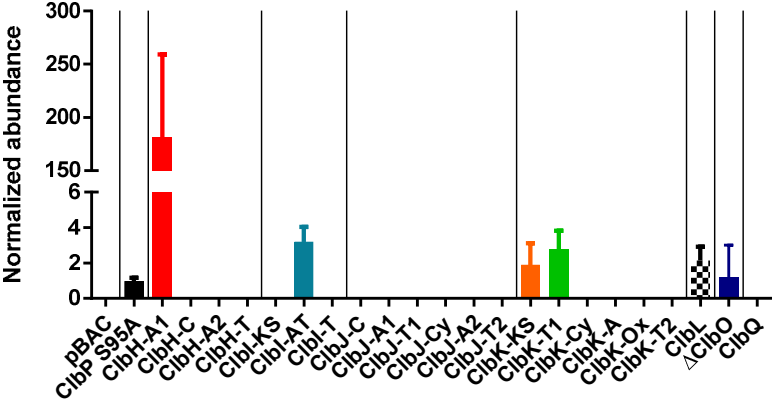 <p style="text-align: center;">Normalized abundance</p> <p style="text-align: center;">Genotype</p>   | 7 |
| 852.3859* | 15.3 | <p style="text-align: center;"><b>852.3859</b></p>  <p style="text-align: center;">Normalized abundance</p> <p style="text-align: center;">Genotype</p>  |   |
| 887.3796  | 15.9 | <p style="text-align: center;"><b>887.3796</b></p>  <p style="text-align: center;">Normalized abundance</p> <p style="text-align: center;">Genotype</p> | 6 |

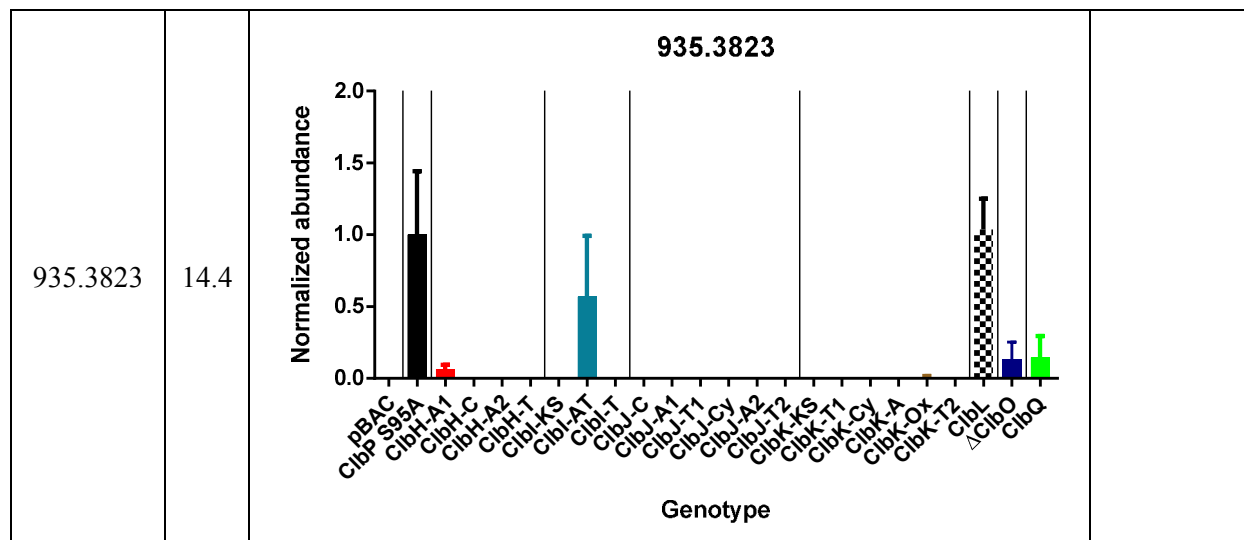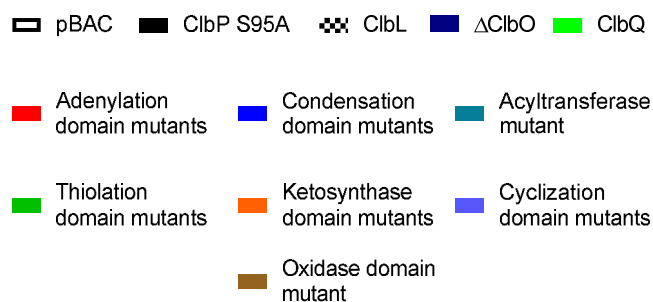

New ions are indicated with an asterisk

## Supplemental Figures

### A. Ketosynthase domains

```

130          140          150          160          170*
ClbB SPHWLN.AVMQDT.TDSTALYKASILNIHSVTA.LIAHA*LNLTC*CPAVTLDTA*CSTSAVAI
ClbC DVDWLRRSLSQIG.GDALNRFESGIYGHKDLLAHLIAYS*LNLNCPVYSLYTSCSTSLSAT
ClbI DSYLMNLNMPHFKRVFSSGSLQAAIIGNDKDSITTTIAYH*LNLRC*CPAIVTQTS*SSTSLVAV
ClbK SFYLLTHLMNPPDKLAQLGGLOIMVGN*DKHLLTSQIAYRLNIT*CPCVTVQAS*CATSLVAV
ClbO NNYFIDR*VYPYLKMSGDHHYLAQIGNEKDYLCQAQVAYKLGFT*CPAVSVQTA*CSSSLVAA

```

### B. Thiolation domains

```

1 10 20 30* 40 50 60
clbJ-T2 .....QQVAALWCEVLRQREQIGLNDNFFEAG.GGSIQIVLLHRRIEEIFKVTVP*IAELFRL..TVKRR
clbK-T2 .....QRLVALWQEVLRGVSHVSAEDDFFSLG.GSSELVRIQQALEAIIQOEIP*IVDLFRL..PTIAD
ClbH .....ORLAEIQWQLRGLERVTGTTNFFDLG.GHSLLLVQMQQYIGQQCGQHVAVLDLLRF..TTIKR
clbB-T1 .....HALHAIWQRVLRDQDIDSNASFFALG.GTSLDTIRVKGDIKRLGLEIDITDLFKY..PTLTA
clbB-T2 .....RVLCQILEEYLRGLDRVGIDDN*YAEELG.ATSLDMVQLSGQMARHYP.QVSVVSLYNH..ATVRQ
ClbI .....RGLVAICEALLGIDGLGIDDNFFEAG.GHSLMLGMLLAQVQERFAVTLSFFDV*MED..ASVRA
clbJ-T1 .....LLALWMRYLPIKNVDPECDFFRLG.GHSLLA*AVTLVAEINRTFHCALTKKIFHY..STLRA
clbK-T1 .....AVVTEI*WERTLRGVSIDDHNASFFELG.GHSLLASTILYDIQQRYGITCTLSAFFAD..PTIEG
clbc-T .....QYITCLMELLLEISPVGVDDDFFELG.GHSLLV*TQLTSRLERDFNVHIDL*LLTLMEN..PNPRN
clbO-T VSYLSVSDVEK*TWRSLRCIDHYDEHAVIFEY*G.ATSMHVISFVDSCHNIYKIGLTAAD*IYAR..PAIRE
ClbE MKKQDMKAAIREFLSRSLRGHTLNDDDH*IFSLGLVHSLFTVQIILFIEKNFQVELE*SELKTEQIATV*NK
clbN-T .....VRVCVEGAL*LEQTEFDDNENLYVVLG.LD*SHKSIQIAAQLR.HHGWTMSAVQVMEC..GTVNA

```

### C. Condensation domains

```

110 120 130 * 140 150
ClbH PLTSGTPLCRF.EL*LTLD*DDR*SVLLIHH*IISDC*WSKGVLLRE*LQAAYN.....
ClbJ_1 DLARG.PLWGV.TQIIQ..PDQGCHLVFC*ARR*IIDG*ISLRL*LFDEL*LQQQYARLHAG...
ClbB KYPESLKTIPVRAYLIQ..STKESAFILSYHH*IVMDG*WSLSLF*IKQL*LLQLYGA*AVVSGVR
ClbN RQPF*TLLA*HDL*FEFV*TFTCGEQYSGYLFK*ARR*GIADG*WSMALL*SNHV*KRAYE.....

```

### D. Cyclization domains

```

120 130 * 140 150 160 170
ClbJ_2 ACTA*QHGR*RLH*FS*EDLLI*ADAL*SMRTLQQEL*MMLYR*EP*HVS*LP*LP*FS*FRDYV*QAL*LVEQA
ClbK VDPQ*QKAR*RLH*V*S*EDLLI*ADAW*SELFIR*ELAY*HYR*HP*QAA*LP*LT*YS*FRDYV*LT*LKSYEK

```

### E. Adenylation domains

```

120 130 * 140 150 160 170
ClbJ-A2 LPEVAGDVT*D.LAYIIFTSC*STGTPKGV*MIDHRAAMNTLED*INERFGLNAQDRV*FGLSS*L
ClbK-A LPEVAGDVT*D.LAYIIFTSC*STGTPKGV*MIDHRAAMNTLED*INERFGLNAQDRV*FGLSS*L
ClbN-A EPWPAIEPQD.LAYVLF*TSC*STGTPKGV*QVSHGNLANYLHFAAERY.FTAQDR*AAALYSS*L
ClbH-A2 PVSVA*PDALDCDA*VVIFTSC*TGTPKGV*RLSQRN*LVNLTASFISSYQVTHQD*VLLPIT*SV
ClbJ-A1 YSTPCALLPDMQAYLL*F*TSC*STGTPKGV*CVVHRG*LLNLLDMQRTFAVGSQD*RLLSV*ITP
ClbH-A1 DLRYRPHARQ.LAYIIYTSC*STGTPKGV*VATEHAA*LLN*RIVW*QONAYP*ISSQD*VLFQKT*VY
ClbB-A SVVFPVITPDSRAYVIYSS*STGTPKGV*I*AVHRG*LLRLIQ.GDSPLK*VESGET*TLT*CPF

```

**Figure S1. Protein sequence alignments of NRPS-PKS domains from the colibactin pathway.** The sites selected for mutation are denoted with an asterisk. **(A)** The ketosynthase active site is a conserved cysteine residue; however, in ClbI, the active site is naturally mutated to serine. **(B)** The phosphopantetheine attachment site of thiolation domains is a conserved serine residue; mutation to alanine abolishes activity by preventing posttranslational modification. **(C)** The second histidine in the HHxxxDG motif of condensation domains acts as a catalytic base; mutation to alanine abolishes activity. **(D)** The DxxxxD motif of cyclization domains was previously thought to act as the catalytic base in the cyclization reactions. While this has recently been shown to be structurally inaccurate, mutation of both aspartates to alanine abolishes activity *in vivo*. **(E)** Adenylation domains contain a flexible loop that interacts with the pyrophosphate leaving group upon adenylation. Mutation of the glycine in this loop to aspartate abolishes activity.

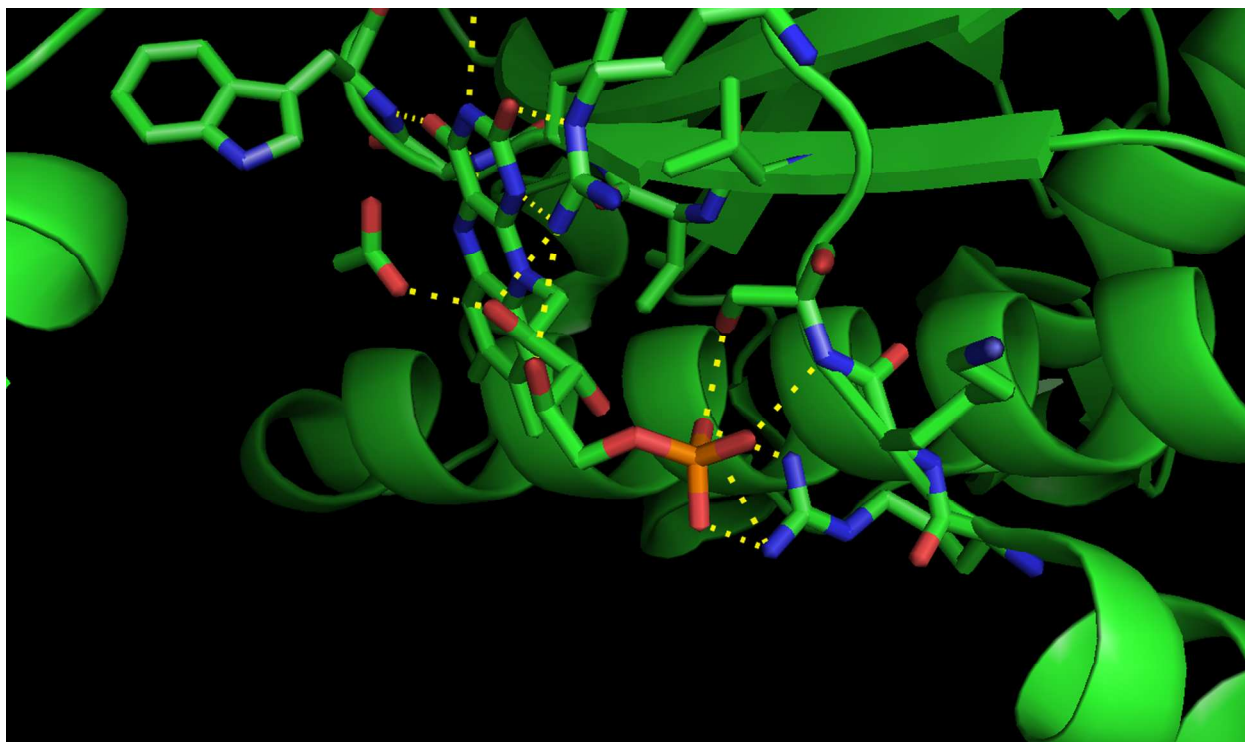

**Figure S2. FMN-binding site of the ClbK oxidase domain homolog from *Ralstonia eutropha*** (PDB code: 3hj9). Hydrogen bonds, depicted by yellow dashes, identify residues to mutate to disrupt the flavin mononucleotide (FMN)-binding site. Residues R1768 and S1770 hydrogen bond with the phosphate of FMN and are conserved across the mcbC-like oxidoreductase family. These residues were mutated to aspartate residues to introduce a repulsive electrostatic interaction, which abolished activity *in vivo*.

A.

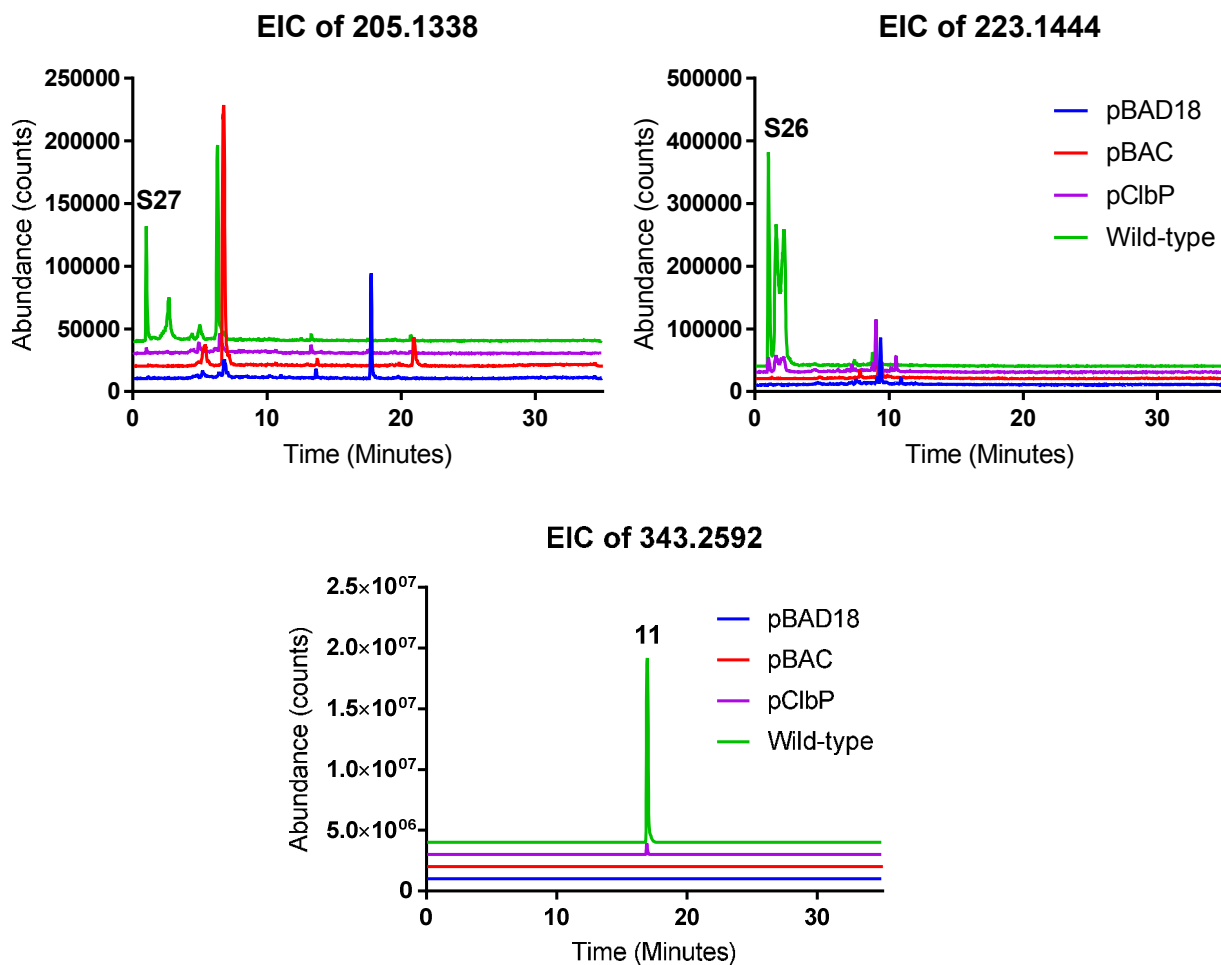

B.

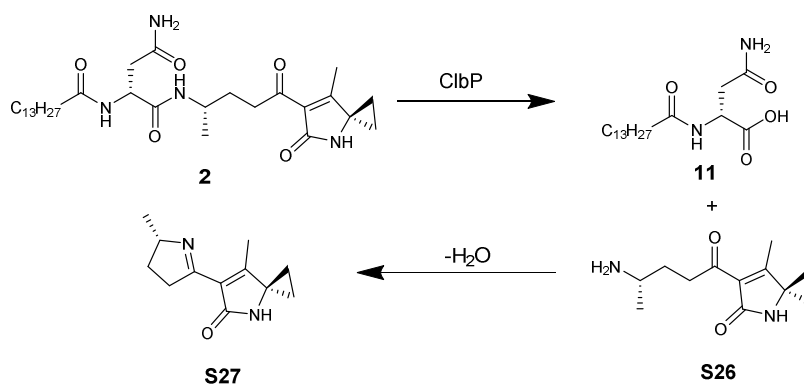

**Figure S3. Cleavage of compound 2 by ClbP.** (A) Cultures of pBAD18 or pCibP were grown to an  $OD_{600}$  of 0.5, and then induced with 0.01% arabinose. Compound 2 was added at a final concentration of 10  $\mu$ M and incubated for four hours. The production of 11, S26, and S27 was monitored and compared to extracts of cultures expressing the full-length pathway. EIC analysis shows that S26 and S27 are also produced by wild-type (pBAC-PKS). The production of these compounds is detailed in part B.



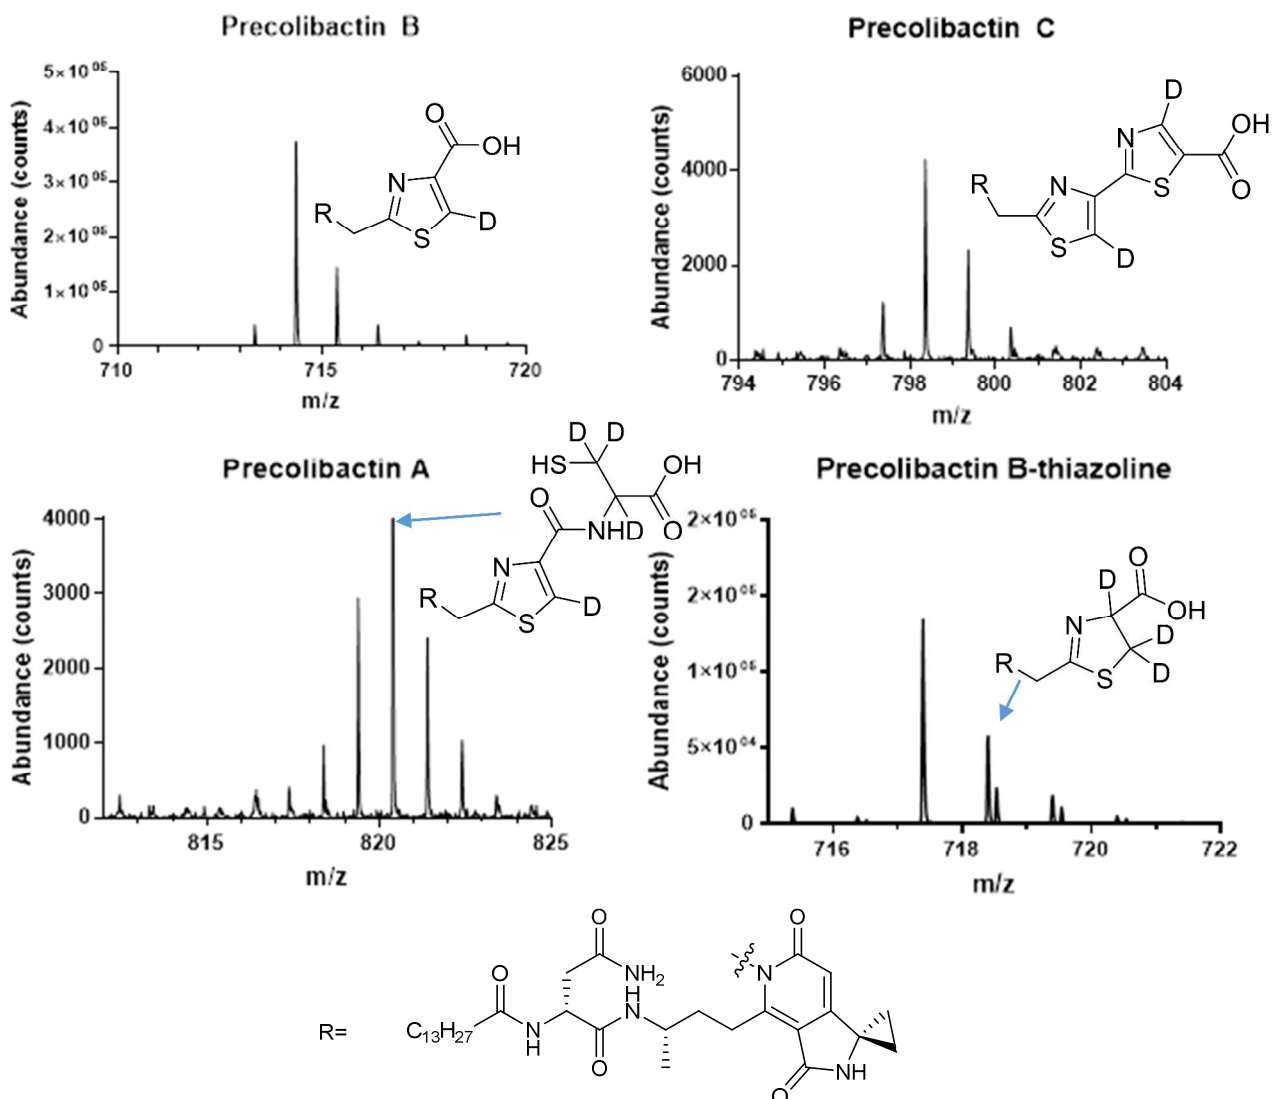

**Figure S4. Incorporation of 2,3,3- $^2\text{H}_3$ -L-cysteine into precolibactins.** Incorporation of the deuterium label occurs as expected for the thiazole-containing precolibactin B and C (top left and right respectively), with one and two deuterium labels being predominantly observed as expected. Ions with masses lacking deuterated cysteine are observed due to competition with naturally produced cysteine. In precolibactin A (bottom left), the predominant species corresponds with a mass of incorporation of 4 deuteriums. However, a species with three deuteriums is observed due to competition with endogenous cysteine as well as some label washout at the  $\alpha$ -carbon. This washout effect is more pronounced in the thiazoline analog of precolibactin B (bottom right) consistent with the increased acidity of its  $\alpha$ -proton (calculated with JChem  $\text{pK}_a$  Calculator 14.8 vs 13.2 for cysteine vs thiazoline). Observation of deuterium signal at the  $\alpha$ -positions support preservation of the L-amino acid configurations.<sup>18</sup>

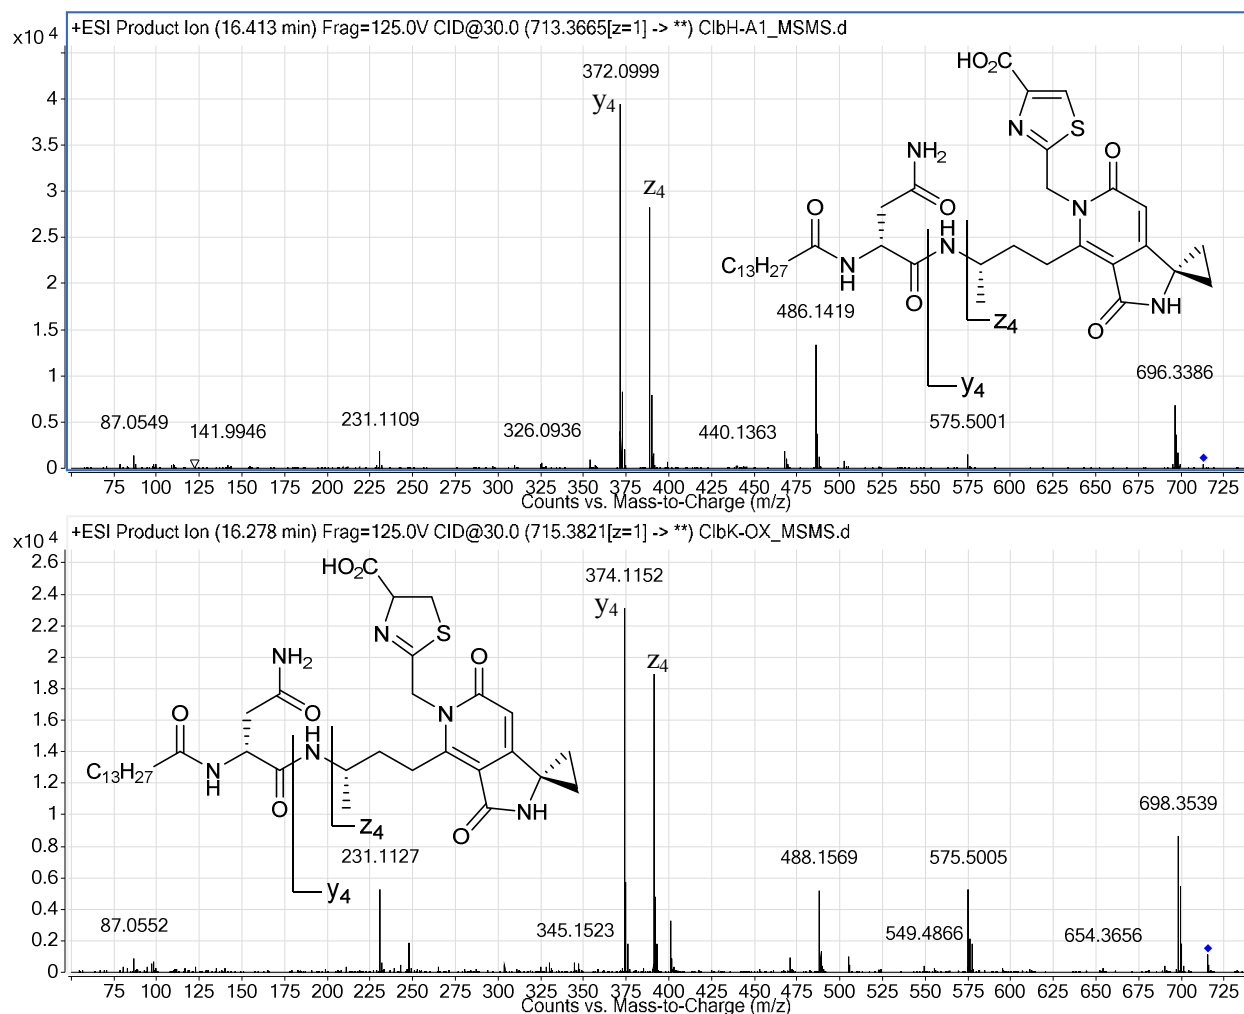

**Figure S5. Comparison of Tandem MS<sup>2</sup> spectra of Precolibactin B and its thiazoline analog.** The fragments containing the pyridone and thiazole in Precolibactin B are shifted by two Daltons, indicating the absence of an oxidation event.

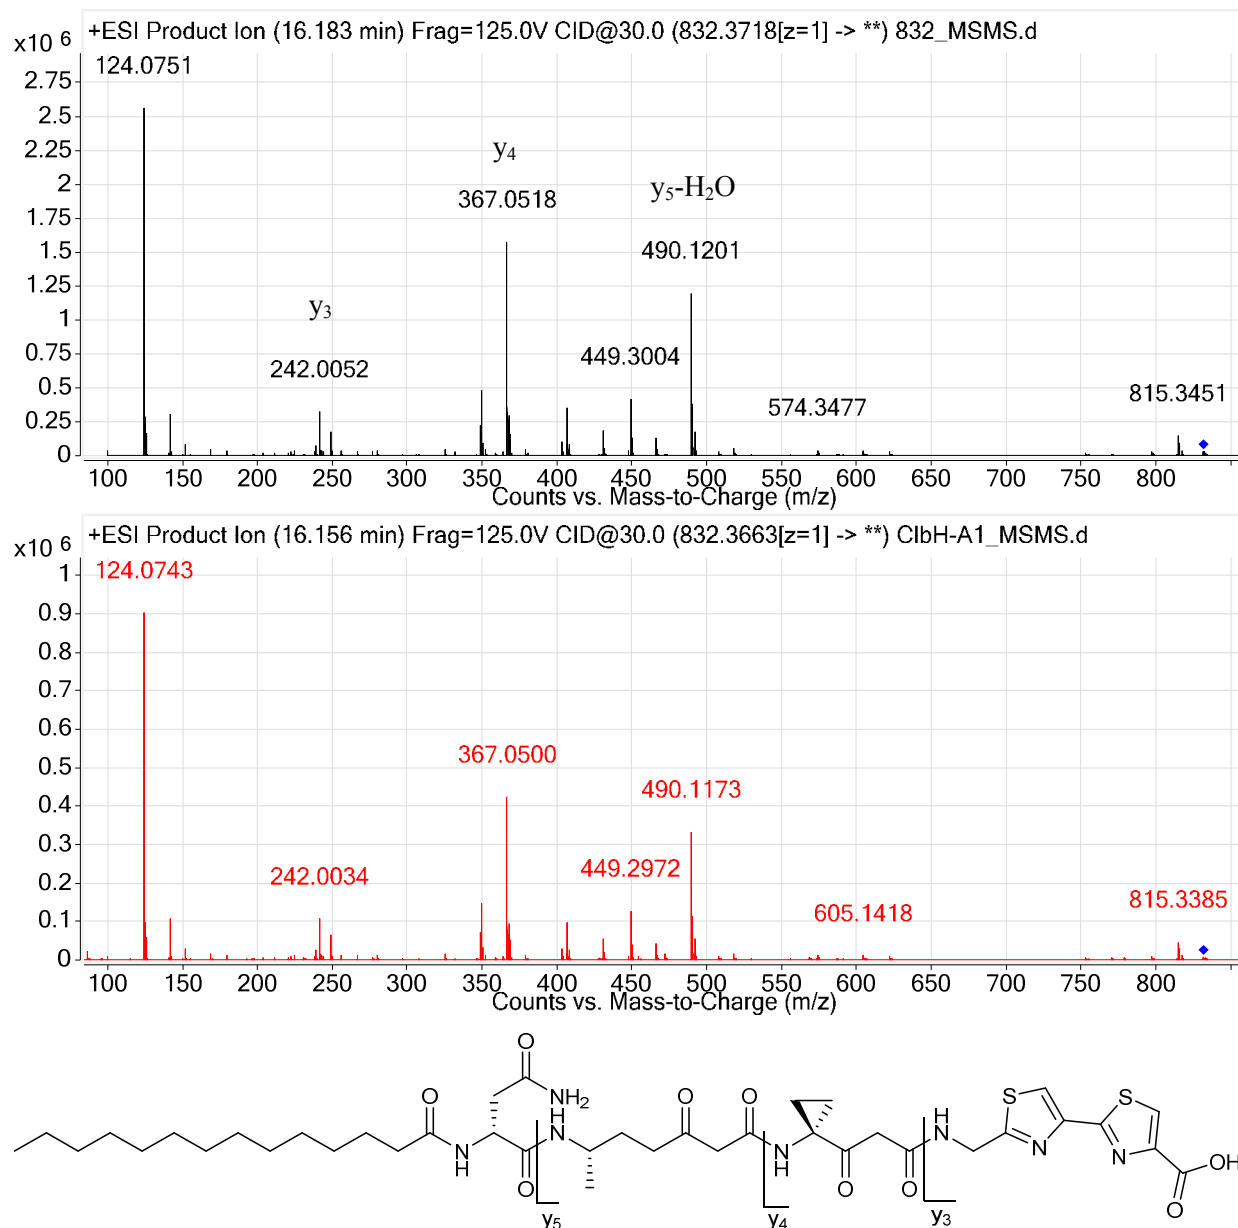

**Figure S6. Comparison of MS/MS spectra of synthetic vs. natural 7.** Tandem MS<sup>2</sup> spectra of synthetic (top, black) vs. natural (bottom, red) 7 are identical. Co-injection also supports structural assignment (Figure 4).

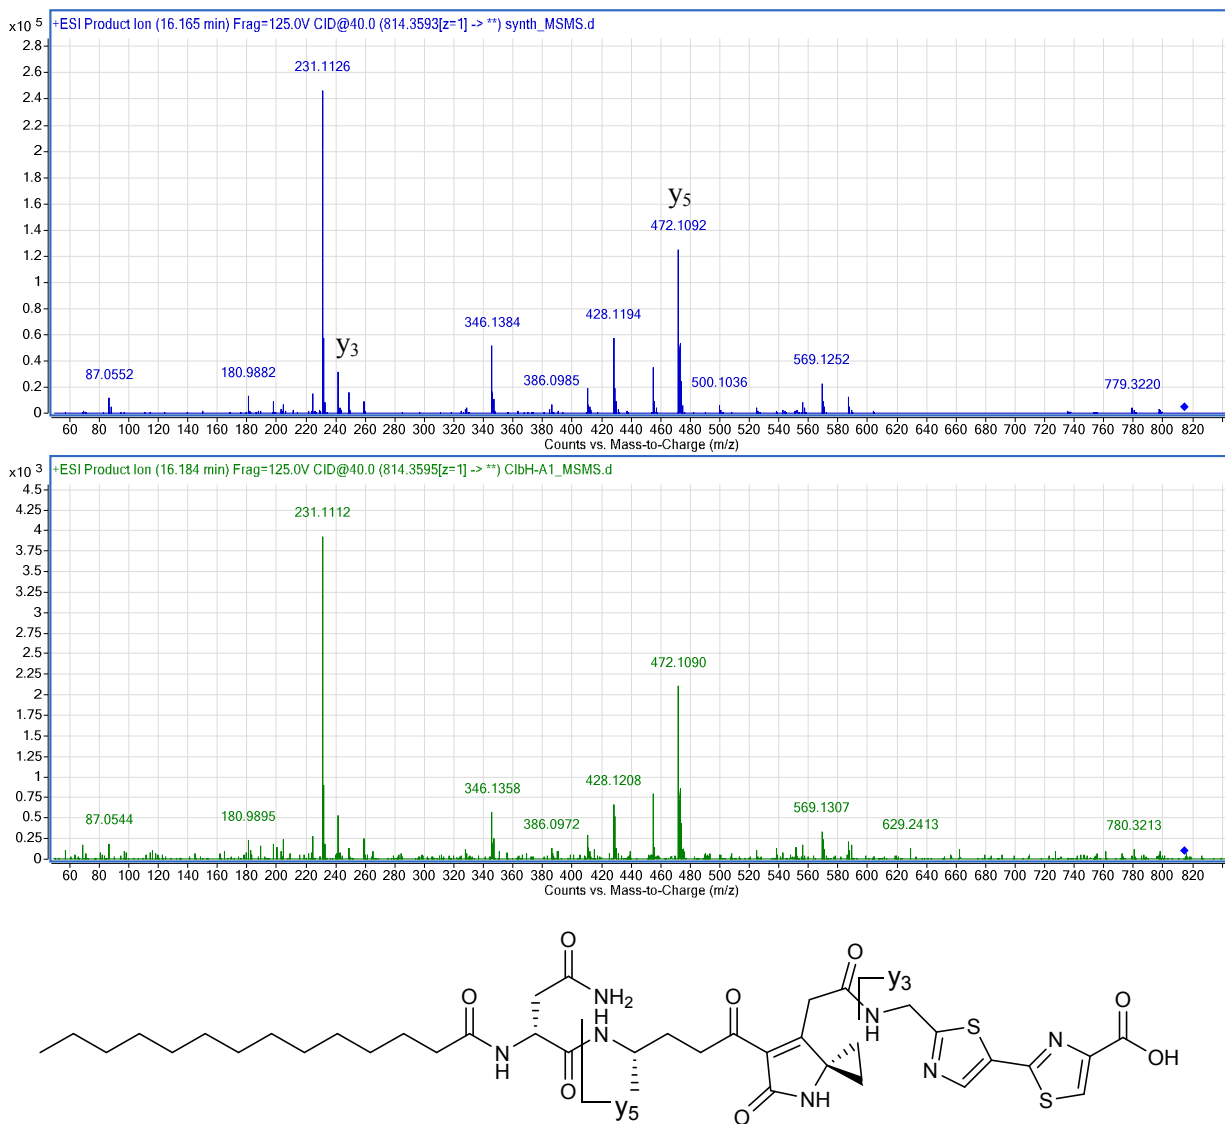

**8**

**Figure S7. Comparison of MS/MS spectra of synthetic vs. natural lactam **8**.** Tandem MS<sup>2</sup> spectra of synthetic (top, blue) vs. natural (bottom, green) **8** are identical. Co-injection experiments also support structural assignment (Figure 4).

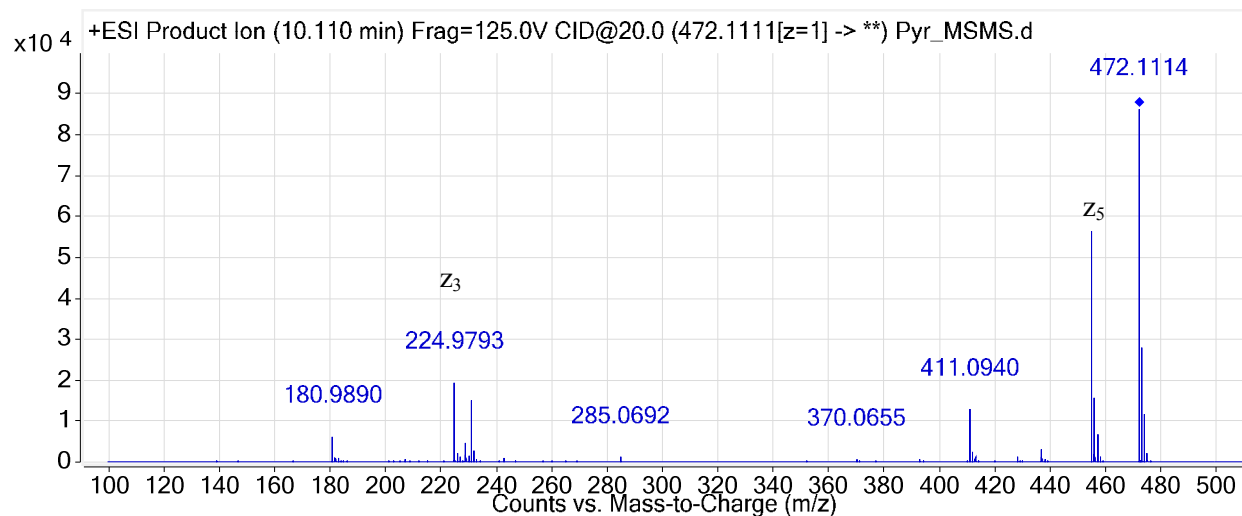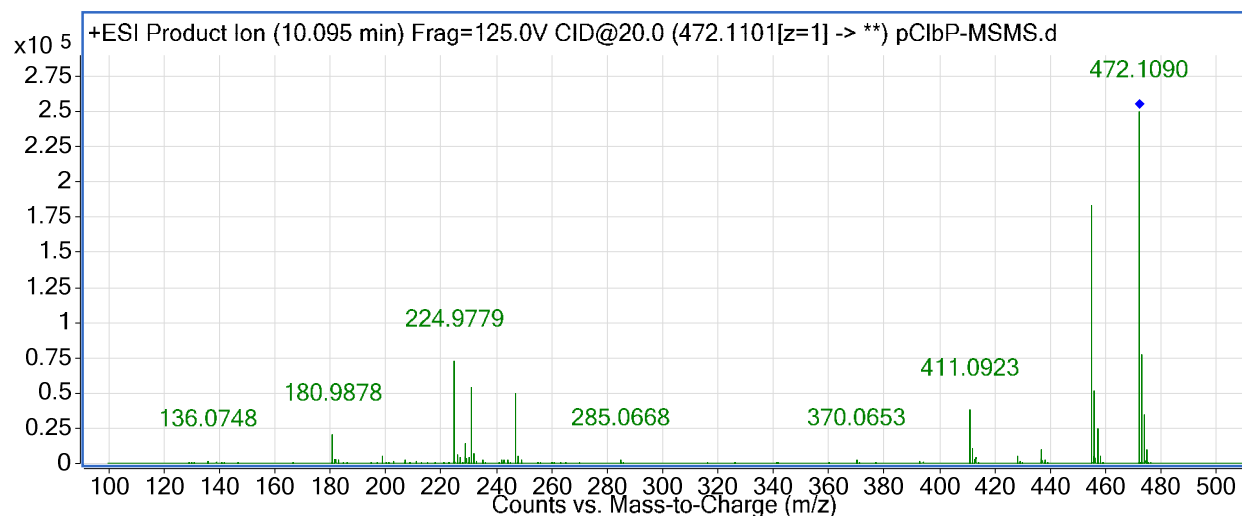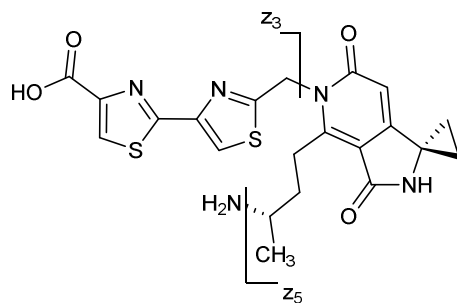

9

**Figure S8.** Comparison of MS/MS spectra of **9**. The ClbP-cleaved precolibactin C product **9** was synthesized according to the route previously published<sup>9</sup>. The tandem MS of synthetic **9** matches that of the ClbP-cleaved metabolite.

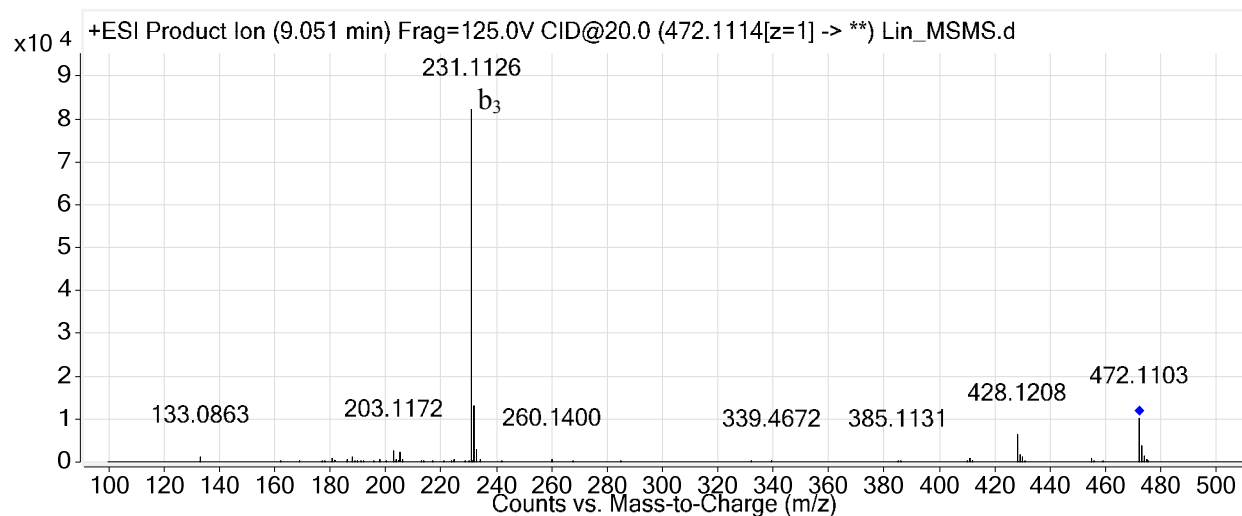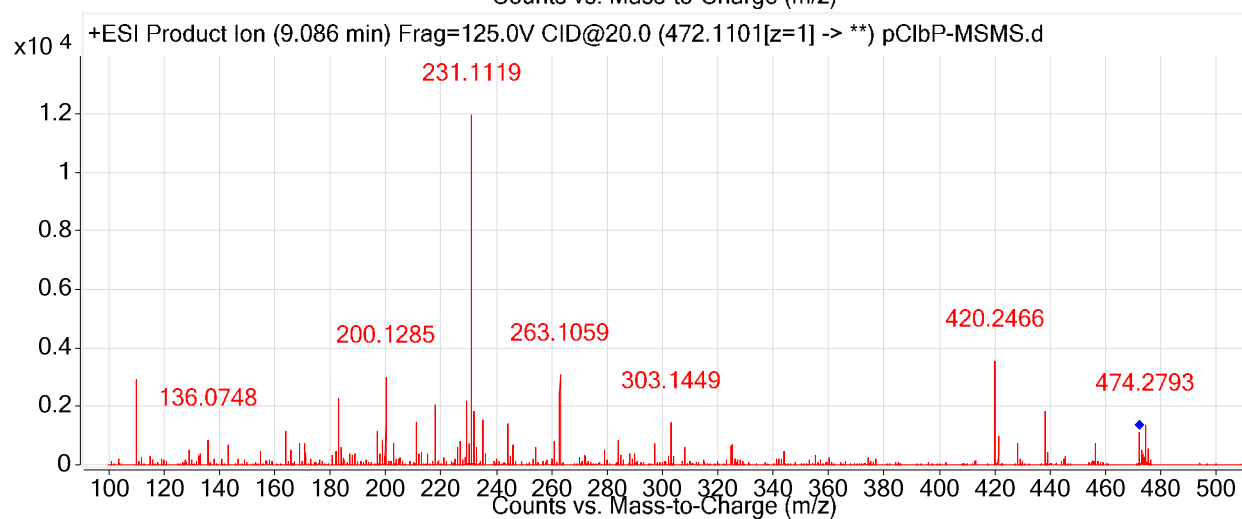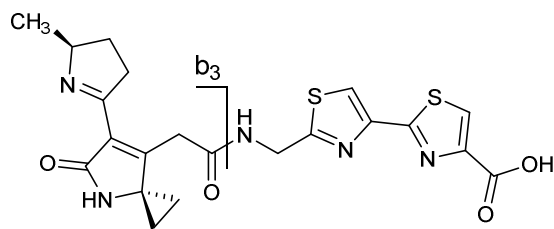

10

**Figure S9.** Comparison of MS/MS spectra of **10**. Precursor **12** was synthesized according to the route previously published.<sup>9</sup> **10** was generated by cyclizing **12** in saturated sodium bicarbonate as previously described (see Supplementary Methods). The tandem MS of the synthetic material matches that of the material generated by ClbP-cleavage of linear precolibactin C (**7**). Metabolite identification was also supported by co-injection experiments (Figure 5).

## Supplementary References:

- (1) Marahiel, M. A.; Stachelhaus, T.; Mootz, H. D. *Chem. Rev.* **1997**, *97*, 2651.
- (2) Dowling, D. P.; Kung, Y.; Croft, A. K.; Taghizadeh, K.; Kelly, W. L.; Walsh, C. T.; Drennan, C. L. *Proc. Natl. Acad. Sci. U S A* **2016**, *113*, 12432.
- (3) Nougayrede, J. P.; Homburg, S.; Taieb, F.; Boury, M.; Brzuszkiewicz, E.; Gottschalk, G.; Buchrieser, C.; Hacker, J.; Dobrindt, U.; Oswald, E. *Science* **2006**, *313*, 848.
- (4) Gallagher, R. R.; Li, Z.; Lewis, A. O.; Isaacs, F. J. *Nat. Protoc.* **2014**, *9*, 2301.
- (5) Zuker, M. *Nucleic Acids Res.* **2003**, *31*, 3406.
- (6) Datsenko, K. A.; Wanner, B. L. *Proc. Natl. Acad. Sci. U S A* **2000**, *97*, 6640.
- (7) Healy, A. R.; Vizcaino, M. I.; Crawford, J. M.; Herzon, S. B. *J. Am. Chem. Soc.* **2016**, *138*, 5426.
- (8) Pangborn, A. B.; Giardello, M. A.; Grubbs, R. H.; Rosen, R. K.; Timmers, F. J. *Organometallics* **1996**, *15*, 1518.
- (9) Healy, A. R.; Nikolayevskiy, H.; Patel, J. R.; Crawford, J. M.; Herzon, S. B. *J. Am. Chem. Soc.* **2016**, *138*, 15563.
- (10) Guzman, L. M.; Belin, D.; Carson, M. J.; Beckwith, J. *J. Bacteriol.* **1995**, *177*, 4121.
- (11) Vizcaino, M. I.; Engel, P.; Trautman, E.; Crawford, J. M. *J. Am. Chem. Soc.* **2014**, *136*, 9244.
- (12) Vizcaino, M. I.; Crawford, J. M. *Nat. Chem.* **2015**, *7*, 411.
- (13) (a) Bian, X. Y.; Plaza, A.; Zhang, Y. M.; Muller, R. *Chem. Sci.* **2015**, *6*, 3154. (b) Brotherton, C. A.; Wilson, M.; Byrd, G.; Balskus, E. P. *Org. Lett.* **2015**, *17*, 1545.
- (14) Li, Z. R.; Li, Y.; Lai, J. Y.; Tang, J.; Wang, B.; Lu, L.; Zhu, G.; Wu, X.; Xu, Y.; Qian, P. Y. *ChemBioChem* **2015**, *16*, 1715.
- (15) Li, Z. R.; Li, J.; Gu, J. P.; Lai, J. Y. H.; Duggan, B. M.; Zhang, W. P.; Li, Z. L.; Li, Y. X.; Tong, R. B.; Xu, Y.; Lin, D. H.; Moore, B. S.; Qian, P. Y. *Nat. Chem. Biol.* **2016**, *12*, 773.
- (16) (a) Brotherton, C. A.; Balskus, E. P. *J. Am. Chem. Soc.* **2013**, *135*, 3359. (b) Bian, X.; Fu, J.; Plaza, A.; Herrmann, J.; Pistorius, D.; Stewart, A. F.; Zhang, Y.; Muller, R. *ChemBioChem* **2013**, *14*, 1194.
- (17) Engel, P.; Vizcaino, M. I.; Crawford, J. M. *Appl. Environ. Microbiol.* **2014**, *81*, 1502.
- (18) Bode, H. B.; Reimer, D.; Fuchs, S. W.; Kirchner, F.; Dauth, C.; Kegler, C.; Lorenzen, W.; Brachmann, A. O.; Grun, P. *Chem. Eur. J.* **2012**, *18*, 2342.
